# Supplementary material for: Dynamic Evolution of α-Gliadin Prolamin Gene Family in Homeologous Genomes of Hexaploid Wheat
Source: PubMed Central journal article supplement (PMC5980091; doi:10.1038/s41598-018-23570-5), 2018-03-26
Supplement: 41598_2018_23570_MOESM1_ESM.pdf [file 41598_2018_23570_MOESM1_ESM.pdf]

## Supplementary Information

### Dynamic Evolution of $\alpha$ -gliadin Prolamin Gene Family in Homeologous Genomes of Hexaploid Wheat

Naxin Huo<sup>1,2\*</sup>, Tingting Zhu<sup>2\*</sup>, Susan Altenbach<sup>1</sup>, Lingli Dong<sup>3</sup>, Yi Wang<sup>1</sup>, Toni Mohr<sup>1</sup>, Zhiyong Liu<sup>3</sup>, Jan Dvorak<sup>2</sup>, Ming-Cheng Luo<sup>2</sup>, Yong Q. Gu<sup>1</sup>

<sup>1</sup>United States Department of Agriculture-Agricultural Research Service, Western Regional Research Center, Albany, California 94710, U.S.A.

<sup>2</sup>Department of Plant Sciences, University of California, Davis, CA 95616, U.S.A.

<sup>3</sup>State Key Laboratory of Plant Cell and Chromosome Engineering, Institute of Genetics and Developmental Biology, Chinese Academy of Sciences, Beijing 100101, China

\*These authors contributed equally to the work

Corresponding authors:

Yong Q. Gu  
USDA-ARS, Western Regional Research Center  
800 Buchanan Street  
Albany, CA 94710, U.S.A.  
Phone: (510)559-5732 Fax: (510)559-5818  
E-mail: [yong.gu@ars.usda.gov](mailto:yong.gu@ars.usda.gov)

Ming-Cheng Luo  
Department of Plant Sciences,  
University of California, Davis  
Davis CA 95616, U.S.A.  
Phone: (530)754-6235  
E-mail: [mluo@ucdavis.edu](mailto:mluo@ucdavis.edu)

Table S1 Chinese Spring genome sequence contigs in  $\alpha$ -gliadin regions

| Genome   | FALCON Trit 1.0 | seqlength(bp) | Triticum1.0      | seqlength(bp) |
|----------|-----------------|---------------|------------------|---------------|
| A Genome | 000887F         | 758692        | scf7180004654949 | 29177         |
|          | 047975F         | 78715         | scf7180004978732 | 200255        |
|          | 001925F         | 632550        |                  |               |
|          | 012734F         | 283772        |                  |               |
|          | 069750F         | 25153         |                  |               |
|          | 003013F         | 536353        |                  |               |
|          |                 |               |                  |               |
| B Genome | 021496F         | 205976        | scf7180004963015 | 196592        |
|          | 017729F         | 237923        | scf7180004947566 | 315253        |
|          | 050439F         | 60131         | scf7180004993810 | 114424        |
|          | 042920F         | 95938         | scf7180004934336 | 18128         |
|          | 001809F         | 651181        | scf7180004866629 | 31491         |
|          | 048447F         | 67769         | scf7180004469127 | 45100         |
|          | 005515F         | 434302        |                  |               |
|          | 007786F         | 376564        |                  |               |
|          | 068739F         | 26815         |                  |               |
|          | 041981F         | 98458         |                  |               |
|          | 001873F         | 608954        |                  |               |
|          | 006455F         | 384913        |                  |               |
|          |                 |               |                  |               |
|          |                 |               |                  |               |
| D Genome | 009235F         | 335483        | scf7180004912608 | 28315         |
|          | 024844F         | 172037        | scf7180004992456 | 105122        |
|          | 078736F         | 12137         | scf7180004818604 | 26410         |
|          | 045628F         | 86322         |                  |               |
|          | 067696F         | 28741         |                  |               |
|          | 030968F         | 147003        |                  |               |
|          | 010991F         | 311522        |                  |               |
|          | 022739F         | 196559        |                  |               |
|          | 003775F         | 492209        |                  |               |

Note: FALCON Trit 1.0- PacBio only contigs, Triticum1.0- PacBio and Illumina hybrid contigs

**Table S2 Annotation of Chinese Spring *a*-gliadin gene regions and comparison with *Ae. tauschii***

| Annotation                                        | <i>Ae. tauschii</i> |         |         | Chiese spring D |         |         | Chiese spring A |         |         | Chiese spring B |         |         |
|---------------------------------------------------|---------------------|---------|---------|-----------------|---------|---------|-----------------|---------|---------|-----------------|---------|---------|
|                                                   | Gene Symol          | Start   | End     | Gene Symol      | start   | end     | Gene Symol      | start   | end     | Gene Symol      | start   | end     |
| protein canopy-1                                  |                     | 92557   | 95727   |                 |         |         | 409             |         | 3466    | 299             |         | 3686    |
| F-box domain                                      |                     | 104395  | 108735  |                 |         |         | 3974            |         | 173415  | 7714            |         | 12006   |
| 60S ribosomal protein                             |                     | 109769  | 111335  |                 |         |         | 9036            |         | 11928   | 12339           |         | 17053   |
| hypothetical protein F775_01656                   |                     | 497767  | 501940  | 5225            | 7805    |         | 210539          |         | 216931  | 186306          |         | 198290  |
| hypothetical protein TRIUR3_28025                 |                     | 521953  | 525063  | 33850           | 36982   |         | 225417          |         | 252483  | 203378          |         | 236032  |
| E3 ubiquitin-protein ligase UPL4                  |                     | 525188  | 527750  |                 |         |         | 241435          |         | 241830  |                 |         |         |
| Minor histocompatibility antigen H13              |                     |         |         |                 |         |         |                 |         |         | 245724          |         | 250223  |
| Minor histocompatibility antigen H13              |                     | 545148  | 551190  | 45134           | 51394   |         | 292703          |         | 298764  | 272102          |         | 277989  |
| Glucan endo-1,3-beta-glucosidase 3                |                     | 633728  | 638943  | 82825           | 87061   |         | 385619          |         | 390993  | 308802          |         | 312640  |
| pentatricopeptide repeat-containing protein       |                     | 640747  | 642820  | 87834           | 90669   |         | 391220          |         | 393671  | 314256          |         | 330245  |
| F-box/FBD/LRR-repeat protein                      |                     | 667099  | 669661  | 114039          | 116600  |         |                 |         |         | 352384          |         | 357710  |
| RPM1                                              |                     |         |         |                 |         |         |                 |         |         | 576772          |         | 583876  |
| F-box/FBD/LRR-repeat protein                      |                     | 675390  | 677475  | 122376          | 126946  |         |                 |         |         | 639698          |         | 643840  |
| F-box/FBD/LRR-repeat protein                      |                     | 678045  | 680271  | 184946          | 186036  |         |                 |         |         |                 |         |         |
| F-box/FBD/LRR-repeat protein                      |                     | 751389  | 755472  |                 |         |         | 669622          |         | 672868  |                 |         |         |
| Adenosylhomocysteinase                            |                     | 755551  | 777421  | 202363          | 205691  |         |                 |         |         |                 |         |         |
| F-box/FBD/LRR-repeat protein                      |                     | 836363  | 840228  | 266734          | 271961  |         | 733298          |         | 736457  | 717334          |         | 720972  |
| Chloroplastic                                     |                     | 849400  | 852898  | 287670          | 289442  |         | 791123          |         | 793138  | 762820          |         | 767710  |
| chaperone protein DnaJ                            |                     |         |         |                 |         |         | 794801          |         | 795671  |                 |         |         |
| Glutamate receptor 3.1                            | GLR-D'1             | 855554  | 859160  | GLR-D1          | 290816  | 297037  | GLR-A1          | 801093  | 805487  | GLR-B1          | 768386  | 772142  |
| Glutamate receptor 3.1                            | GLR-D'2             | 966212  | 969981  | GLR-D2          | 421554  | 427327  | GLR-A2          | 814531  | 820275  | GLR-B2          | 832947  | 838631  |
| hypothetical protein TRIUR3_04005                 |                     |         |         |                 |         |         | 897112          |         | 903671  |                 |         |         |
| <i>a</i> -gliadin                                 | <i>a</i> -D'1       | 1001409 | 1002271 | <i>a</i> -D1    | 458540  | 459403  | <i>a</i> -A1    | 995875  | 996759  | <i>a</i> -B1    | 870320  | 871228  |
| <i>a</i> -gliadin                                 |                     |         |         |                 |         |         | <i>a</i> -A2    | 1034005 | 1034961 | <i>a</i> -B2    | 921475  | 922359  |
| <i>a</i> -gliadin                                 |                     |         |         |                 |         |         |                 |         |         | <i>a</i> -B3    | 959814  | 960806  |
| <i>a</i> -gliadin                                 |                     |         |         |                 |         |         |                 |         |         | <i>a</i> -B4    | 965651  | 966196  |
| <i>a</i> -gliadin                                 |                     |         |         |                 |         |         |                 |         |         | <i>a</i> -B5    | 966197  | 966633  |
| Glutamate receptor 3.1                            | GLR-D'3             | 1007729 | 1011532 | GLR-D3          | 463781  | 468764  | GLR-A3          | 1128596 | 1133528 | GLR-B3          | 983220  | 986860  |
| <i>a</i> -gliadin                                 | <i>a</i> -D'2       | 1055096 | 1055342 | <i>a</i> -D2    | 512055  | 512305  | <i>a</i> -A3    | 1182025 | 1182889 | <i>a</i> -B6    | 1004951 | 1005907 |
| <i>a</i> -gliadin                                 | <i>a</i> -D'3       | 1061229 | 1062082 |                 |         |         | <i>a</i> -A4    | 1218752 | 1219601 | <i>a</i> -B7    | 1016169 | 1017110 |
| <i>a</i> -gliadin                                 | <i>a</i> -D'4       | 1095454 | 1096297 | <i>a</i> -D4    | 518180  | 519055  | <i>a</i> -A5    | 1314262 | 1315182 | <i>a</i> -B8    | 1042234 | 1043184 |
| <i>a</i> -gliadin                                 | <i>a</i> -D'5       | 1137283 | 1138187 | <i>a</i> -D5    | 553251  | 554177  | <i>a</i> -A6    | 1423738 | 1424592 | <i>a</i> -B9    | 1053446 | 1054387 |
| <i>a</i> -gliadin                                 | <i>a</i> -D'6       | 1163469 | 1164361 | <i>a</i> -D6    | 578406  | 579290  | <i>a</i> -A7    | 1517352 | 1518224 | <i>a</i> -B10   | 1064645 | 1065586 |
| <i>a</i> -gliadin                                 | <i>a</i> -D'7       | 1186283 | 1187124 | <i>a</i> -D7    | 602940  | 603791  | <i>a</i> -A8    | 1581439 | 1582302 | <i>a</i> -B11   | 1310666 | 1311544 |
| <i>a</i> -gliadin                                 | <i>a</i> -D'8       | 1210543 | 1211405 | <i>a</i> -D8    | 627665  | 628543  | <i>a</i> -A9    | 1633882 | 1634775 | <i>a</i> -B12   | 1332444 | 1333340 |
| <i>a</i> -gliadin                                 | <i>a</i> -D'9       | 1242375 | 1243652 | <i>a</i> -D9    | 659232  | 660092  | <i>a</i> -A10   | 1689164 | 1690003 | <i>a</i> -B13   | 1369120 | 1370001 |
| <i>a</i> -gliadin                                 | <i>a</i> -D'10      | 1265184 | 1266037 | <i>a</i> -D10   | 684038  | 684907  |                 |         |         | <i>a</i> -B14   | 1381550 | 1382425 |
| <i>a</i> -gliadin                                 | <i>a</i> -D'11      | 1396535 | 1397817 | <i>a</i> -D11   | 814221  | 815366  |                 |         |         | <i>a</i> -B15   | 1403073 | 1403945 |
| <i>a</i> -gliadin                                 | <i>a</i> -D'12      | 1547554 | 1548412 | <i>a</i> -D12   | 904919  | 905767  |                 |         |         | <i>a</i> -B16   | 1418791 | 1419681 |
| <i>a</i> -gliadin                                 |                     |         |         |                 |         |         |                 |         |         | <i>a</i> -B17   | 1429202 | 1430092 |
| <i>a</i> -gliadin                                 |                     |         |         |                 |         |         |                 |         |         | <i>a</i> -B18   | 1439610 | 1440494 |
| <i>a</i> -gliadin                                 |                     |         |         |                 |         |         |                 |         |         | <i>a</i> -B19   | 1465984 | 1466683 |
| <i>a</i> -gliadin                                 |                     |         |         |                 |         |         |                 |         |         | <i>a</i> -B20   | 1494099 | 1494914 |
| <i>a</i> -gliadin                                 |                     |         |         |                 |         |         |                 |         |         | <i>a</i> -B21   | 1503116 | 1503928 |
| <i>a</i> -gliadin                                 |                     |         |         |                 |         |         |                 |         |         | <i>a</i> -B22   | 1523686 | 1606266 |
| <i>a</i> -gliadin                                 |                     |         |         |                 |         |         |                 |         |         | <i>a</i> -B23   | 1630120 | 1630998 |
| <i>a</i> -gliadin                                 |                     |         |         |                 |         |         |                 |         |         | <i>a</i> -B24   | 1635342 | 1635572 |
| Glutamate receptor 3.1                            | GLR-D'4             | 1686662 | 1691883 | GLR-D4          | 1039153 | 1042705 | GLR-A4          | 1739408 | 1742963 | GLR-B4          | 1667279 | 1672684 |
| FKBP-type peptidyl-prolyl cis-trans isomerase 1   |                     | 1692096 | 1693651 |                 | 1043561 | 1044874 |                 | 1743941 | 1745281 |                 | 1672813 | 1674320 |
| UTP--glucose-1-phosphate uridylyltransferase      |                     | 1693974 | 1698030 |                 | 1045218 | 1049278 |                 | 1745624 | 1749592 |                 | 1674684 | 1678697 |
| LRR receptor-like serine/threonine-protein kinase |                     | 1706689 | 1709614 |                 | 1056743 | 1060256 |                 |         |         |                 |         |         |
| autophagy-related protein 5b                      |                     | 1709869 | 1714699 |                 |         |         |                 | 1784221 | 1788290 |                 | 1769246 | 1796599 |
| autophagy-related protein 5b                      |                     | 1715457 | 1719914 |                 | 1064533 | 1070359 |                 | 1789079 | 1795854 |                 | 1804110 | 1809147 |
| autophagy-related protein 5b                      |                     |         |         |                 |         |         |                 |         |         |                 | 1845256 | 1848786 |
| protein trichome birefringence-like 12            |                     | 1723285 | 1728123 |                 | 1081013 | 1085814 |                 | 1798743 | 1802183 |                 | 1851349 | 1854749 |
| RNA-binding protein 7                             |                     |         |         |                 |         |         |                 |         |         |                 | 2039193 | 2044420 |
| heat shock 70kDa protein 8, isoform CRA_c         |                     |         |         |                 |         |         |                 |         |         |                 | 2108931 | 2119210 |
| nuclear cap-binding protein subunit 1             |                     |         |         |                 |         |         |                 |         |         |                 | 2222692 | 2234574 |
| calcium-binding protein CML49                     |                     |         |         |                 |         |         |                 |         |         |                 | 2368020 | 2369396 |
| protein yippe-like At4g27745                      |                     |         |         |                 |         |         |                 |         |         |                 | 2384604 | 2391732 |
| protein trichome birefringence-like 12            |                     | 1737536 | 1740991 |                 | 1095117 | 1107589 |                 | 1863321 | 1868273 |                 | 2392699 | 2396187 |

Table S3. Estimation of  $\alpha$ -gliadin transcript abundances in different developmental stages and tissues in Chinese Spring

|                                                      | 10WE      | 20AL      | 20SE      | 20 TC     | 30SE      | 30ALSE    |
|------------------------------------------------------|-----------|-----------|-----------|-----------|-----------|-----------|
| Total $\alpha$ -gliadin gene reads                   | 13392050  | 10936016  | 31592896  | 20866018  | 29630536  | 20236351  |
| Total reads mapped to complete gene set              | 135836843 | 219235733 | 134302445 | 133453380 | 132547092 | 130940454 |
| Total RNA-seq reads                                  | 221603358 | 375865316 | 227982060 | 218525346 | 227067144 | 225584234 |
| % $\alpha$ -gliadin reads in total mapped gene reads | 9.9       | 5.0       | 23.5      | 15.6      | 22.4      | 15.5      |
| % $\alpha$ -gliadin reads in total RNA-seq reads     | 6.0       | 2.9       | 13.9      | 9.5       | 13.0      | 9.0       |

Note: RNA-seq data were downloaded from Pfeiffer *et al.*, (2014). 10WE –whole embryo at 10 days post anthesis, 20AL – Aleurone layer at 20 days, 20SE-seed endosperm at 20 days, 20TC- Transfer cells at 20 days, 30SE- seed endosperm at 30 days, 30ALSE- Aleurone + seed endosperm at 30 days

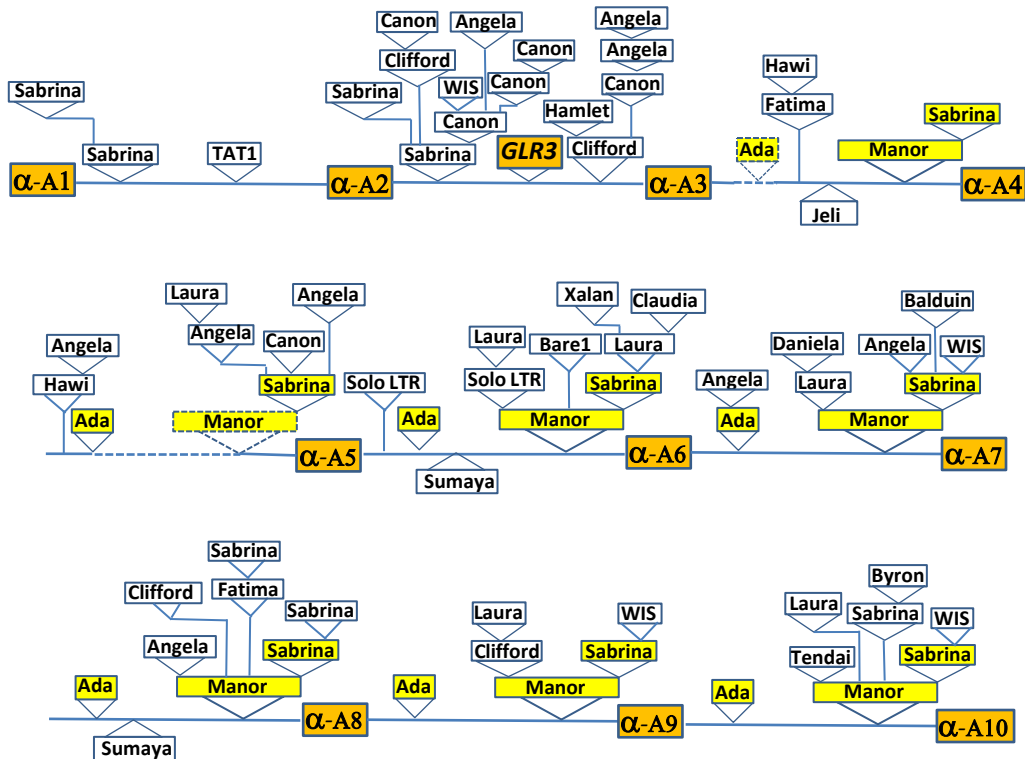

**Figure S1. Genomic organization of the  $\alpha$ -gliadin locus region in Chinese Spring A genome.**

The genomic sequence containing  $\alpha$ -gliadin genes was annotated as described in Materials and Methods.  $\alpha$ -gliadin genes are represented by boxes filled with color. Retroelements are boxed with their names, and their insertion positions are indicated by triangles or solid vertical lines.

Retroelements shared in the intergenic regions between two  $\alpha$ -gliadin genes are highlighted with yellow. Dashed lines indicate deleted sequences.

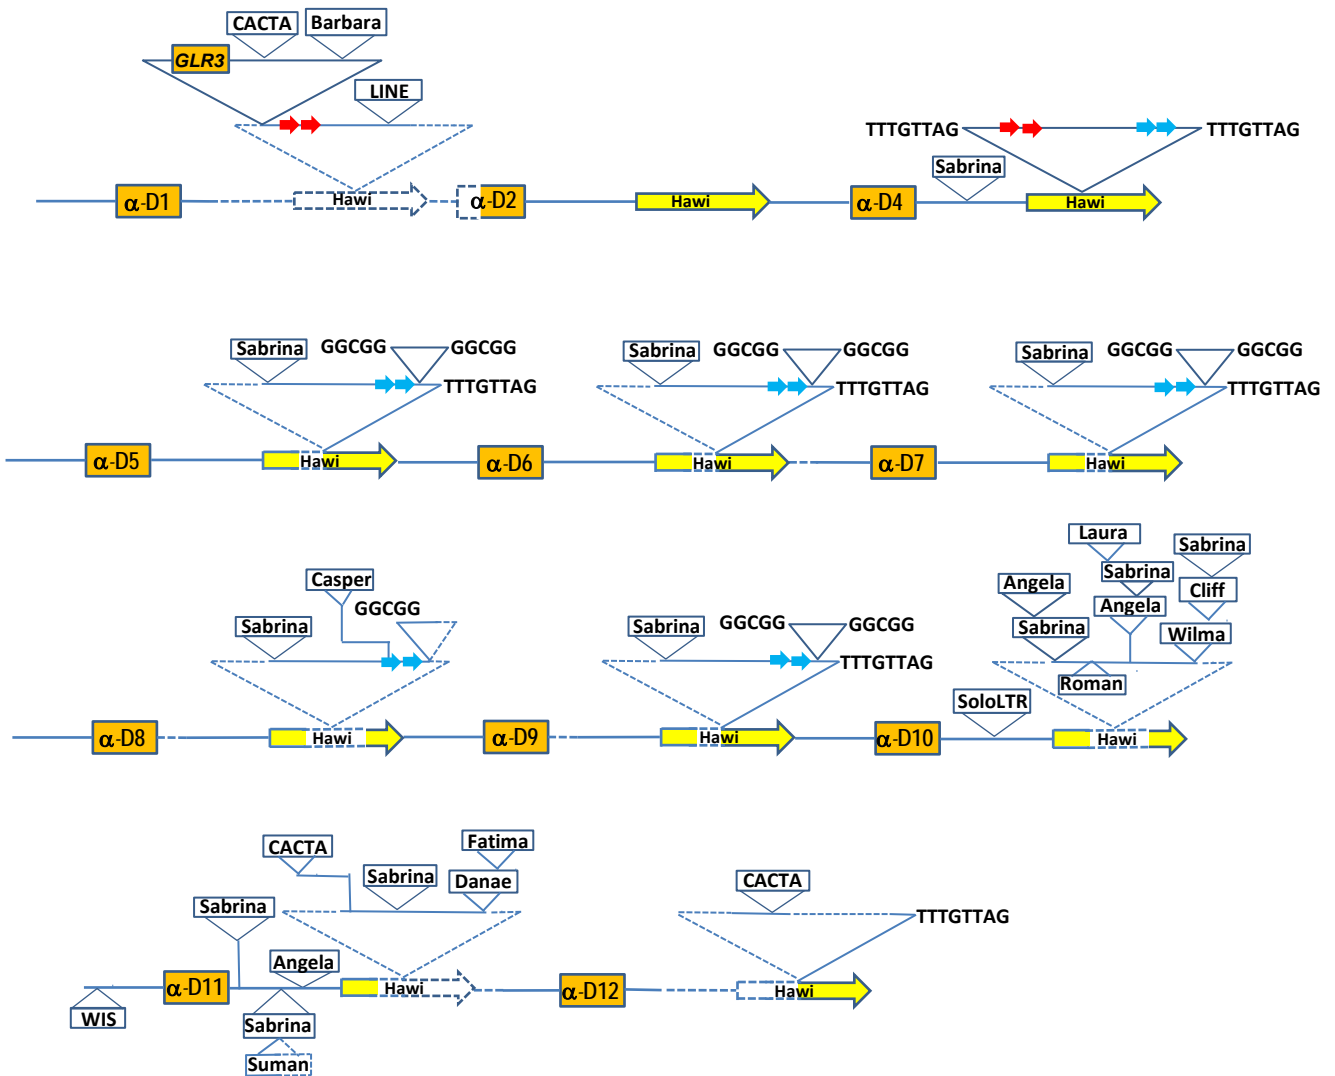

**Figure S2. Genomic organization of the  $\alpha$ -gliadin locus region in Chinese Spring D genome.** The genomic sequence containing  $\alpha$ -gliadin genes was annotated as described in Materials and Methods.  $\alpha$ -gliadin genes are represented by boxes filled with color. *Hawi* repetitive DNA sequences are represented by yellow arrows. Two different tandem repeats in an inserted sequence and not found in the TREP repetitive element database, are indicated by the red- and blue-colored arrows. Dashed lines indicate deleted sequences. Retroelements are boxed with their names, and their insertion positions are indicated by triangles or solid vertical lines.

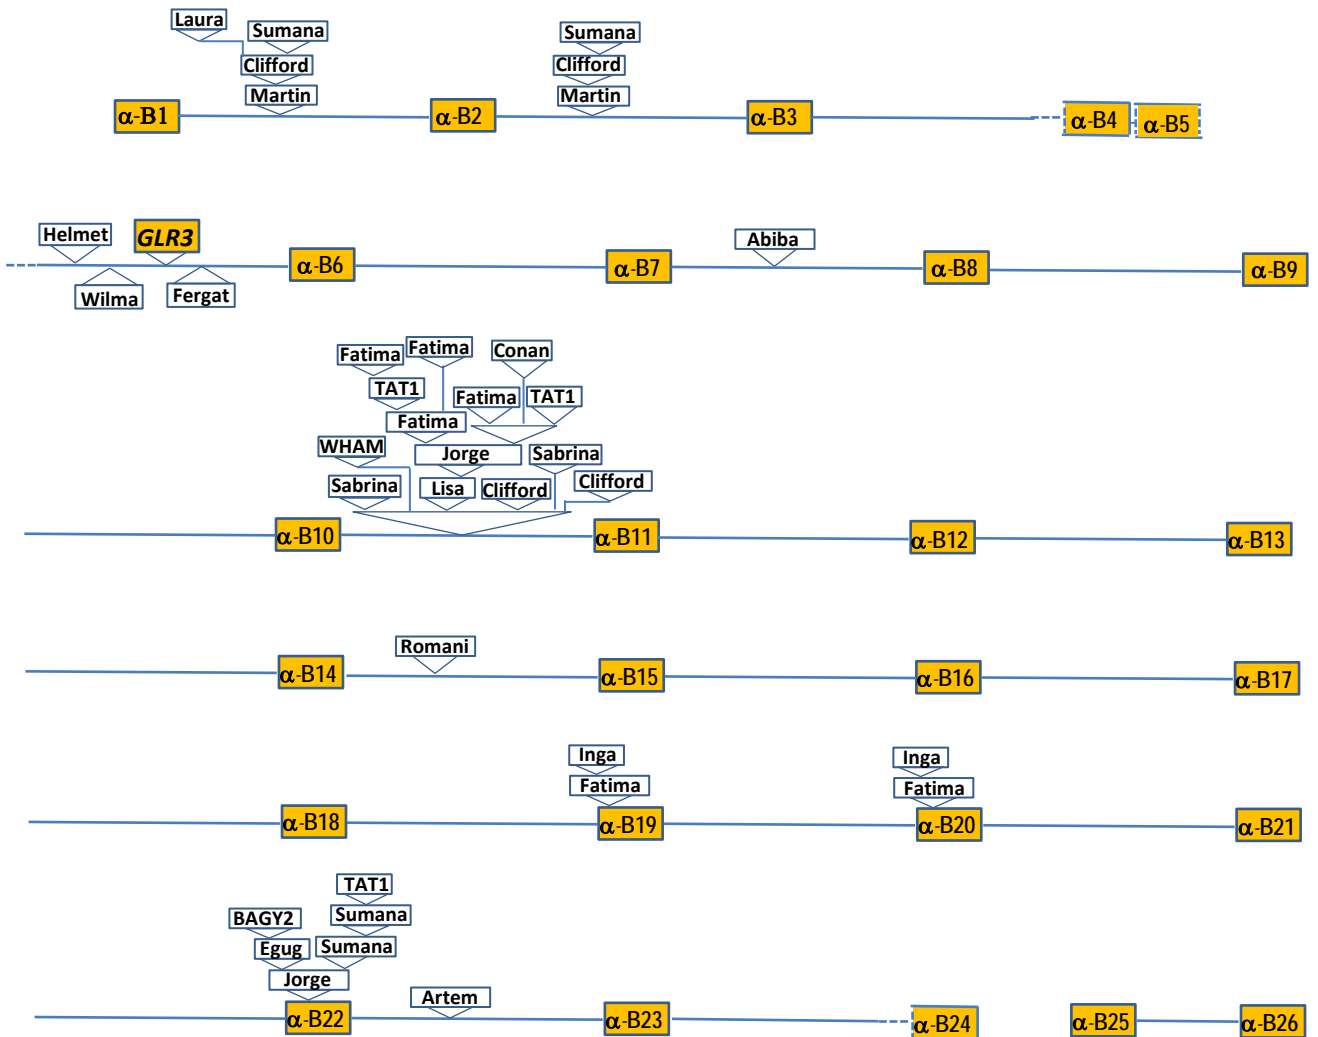

**Figure S3. Genomic organization of the  $\alpha$ -gliadin locus region in Chinese Spring B genome.** The genomic sequence containing  $\alpha$ -gliadin genes was annotated as described in Materials and Methods.  $\alpha$ -gliadin genes are represented by boxes filled with color. Retroelements are boxed with their names, and their insertion positions are indicated by triangles or solid vertical lines. Dashed lines indicate deleted sequences.

Figure S4. Nucleotide and amino acid sequences of  $\alpha$ -gliadin genes in Chinese Spring

$\alpha$ -A1 Nucleotide 885 bp

ATGAAGACTTTTCTCATCCTTGCCCTCCTTGCTATGTGGCGACCACTGCCACAACCTGCAGTTAGAGTTCCAGTGCCACAATTGCA  
GCCGCAAAATCCATCTCTGCAGCAACCACAAGAGCAAGTTCCATTGGTGCAACAACAACAATTTCCAGGGCAGCAACAACATTTCC  
CACCACAACAGCCATATCCGCAGCCGCAACCATTTCCAGCACAACAACCATATCCGCAGCCGCAACTATTTCCACAGCCGCAACCT  
TTTCCGCCACAACCTCCATATCCGCAGCCGCAACCATTTCCCCCACAACAACCATATCCACAACCCGCAAAACACAGCATCTGCAACC  
ACAACAACCAATTTTCGCAGCAACAAGCACAACAACAACAACAACAACAACAACAACAACAACAACAACAACAACAACAACAACAACA  
AACAACCTGATTCCATGCAGGGATGTCATCGTCTTGCACAACAACAACATAGCGCATGAAAGCTCACAAGTATTGCAGCAAAAGTAGT  
TACCAAGTGTGCAACAATTATGTTGTGTCAGCAGCTGCGGCAGATCCCCGAGCAGTCCGCGGTGCCAAGCCATCAACAATGTCGTTCA  
TGCTATTATTCTGCATCAACAACAACAACAAGGACAACATCAACAGTTCGAGCCAGGTCTCCTACCAGCAGCCTCAGCAACAAT  
ATCCATCAGGCCAGGGCTCCTTCCAGCCATCTCAGCAAAATCCACAGGCCAGGGCTTTGTCCAACCTCAACATCTGCCCAACTC  
GAGGAAATAAGTAACCTAGCGCTGCAGACGCTACCAGCAATGTGCAATGTCTACATCCCTCCATATTGCTCGACCACCATTGCGCC  
ATTTGGCATCTTCGGTACTAACTGA

$\alpha$ -A1 amino acid 295 aa

MKTFLLILALLAIVATTATTAVRVPVPLQLPQNPSLQQPQEQVPLVQQQQFPGQQQTFPPQQPYQPQPFPPAQQPYQPQLFPQPQP  
FPPQLPYQPQPFPPQQPYQPQTQHLQPQPISQQQAQQQQQQQQQQILQQILQQQLIPCRDVIIVLQQHNI AHSSQVLQSS  
YQVLQQLCCQQLRQIPEQSRCQAINNVVHAIILHQQQQQQGHQSSQVSYQQPQQQYPSGQSFQPSQQNPQAQGFVQPQHLPLQL  
EEISNLALQTLPAMCNVYIPPYCSTTIAPFGIFGTN.

$\alpha$ -A2 nucleotide 957 bp

ATGAAGACATTTCTCATCATTTCCTCCTTGCTATCGTGGCGACCACCGCCACAACCTGCAGTTAGAGTTCCAGTGCCACAATTGCA  
GCCGCAAAATCCATCTCTGCAACAACCACAAGAGCAAGTTCCATTGGTGCAACAACAACAATTTCCAGGGCAGCAACAACATTTCC  
CACCACAACAACCATATCCGCAGCCGCAACCATTTCCAGGACAACAACCATATCCGCAGCCGCAACTATTTCCACAGCCGCAACCT  
TTTCCGCCACAACCTCCATATCCGCAGCCGCAACCATTTCCCCCACAACAACCATATCCACAACCCGCAAAACACATCATCTGCAACC  
ACAACAACCAATTTTCGCAGCAACAAGTACAACAACAACAACAACAACAACAACAACAACAACAACAACAACAACAACAACAACAACA  
AACAACAACAACCTACTACTACAACAACAATCCTTCAACAATTTGCAACAACAACAACCTGATTCCATGCAGGGATGTCATCGTC  
TTGCAACAACAACATAGCGCATGAAAGCTCACAAGTATTGCAGCAAAAGTAGTTACCAAGTGTGCAACAATTATGTTGTGTCAGCA  
GCTGCGGCTGATCCCCGAGCAGTCCGCGGTGCCAAGCCATCCACAATGTCGTTTCATGCTATTATTCTACATCAACAACAACAACA  
AACAACAACAACAACAAGGACAACATCAACCGTTCGAGCCAGGTCTCCTACCAGCAGCCTCAGCAACAATATCCATCAGGCCAG  
GGCTCCTTCCAGCCATCTCAGCAAAATCCACAGGCCAGGGCTTTGTCCAACCTCAACATCTGCCCAACTCGAGGAAATAAGTAA  
CCTAGCGCTGCAGACGCTACCAGCAATGTGCAATGTCTACATCCCTCCATATTGCTCGACCACCATTGCGCCATTTGGCATCTTCC  
GTACTAACTGA

$\alpha$ -A2 amino acid 319 aa

MKTFLLIISLLAIVATTATTAVRVPVPLQLPQNPSLQQPQEQVPLVQQQQFPGQQQTFPPQQPYQPQPFPPAQQPYQPQLFPQPQP  
FPPQLPYQPQPFPPQQPYQPQTTHLQPQPISQQVQQQQQQQQQQQQQQQQQQQLLLQQILQQILQQQLIPCRDVIIV  
LQQHNI AHSSQVLQSSYQVLQQLCCQQLRLIPEQSRCQAIHNVVHAIILHQQQQQQGHQPSQVSYQQPQQQYPSGQ  
GSFQPSQQNPQAQGFVQPQHLPLQLEEISNLALQTLPAMCNVYIPPYCSTTIAPFGIFGTN.

$\alpha$ -A3 nucleotide 865 bp

ATGAAGACATTTCTCATCCTTTCCCTCCTTGCTATCGTGGCAACCACCGCCACAACCTGCATTTAGAATTCTAGTGCCACAATTGCA  
GCCACAATAATCCATCTTAGCAACAACCACAAGAGCAAGTTCCATTGGTACAACAACAGCAATTTCTAGGGCAGCAACAACCATTTCC  
CACCACAACAACCATATCCACAGCCGCAACCATTTCCATCACAACAACCATATCTGCAGCTGCAACCATTTCCGCAGCCGCAACCA  
CCATATTTCGCAGCCGCAACCATTTCCAGCACAATAACCATATCTCCACAACCCGCAACCACAGTATTTCGCAACCACAATAACCAATT  
TCGCAGCAGCAACAACAACAACAACAACAACAACAACAACAACAACAACAACAACAACAACAACAACAACAACAACAACAACAACA  
TGTTGTATTGCAGCAACAACATAGCGCATGGAAGATCACAAGTTTTCGCAACAAGTAGTTACCAGCTGTTGCAAGAATTGTGTT  
TTCAGCACCTATGACAGATCCCTGAGCAGTCCGAGTCCGCAAGCCATCCACAATGTTGTCCATGCTATTATTCTGCATCAACAACA  
AAACAACAACAACAACAACAACAACAACAACAACAACAACAACAACAACAACAACAACAACAACAACAACAACAACAACAACAACA  
GGGCTCCTTCCGGCCATCTCTGCAAAATCCACAGGCCAGGGCTCGGTCCAGCCTCAACAGCTGCCAGTTCGAGGAAATAAGGAA



CCTAGCGCTACAGACGCTACCTGCAATGTGCAATCTCTACATCCCTCCATATTGCACCATCGCGCCATTTGGCATCTTCGGTACTA  
ACTGA

$\alpha$ -A3 amino acid 295 aa

MKTFLLLSLLAIVATTATTAFRILVPLVQVPLVQQVFLGQQQPFPPQPPYPPQPPFPSQQPYLQLQVPPQPPQ  
PYSQPQFFRPQ.PYL...QPQPQYSQPQ.PISQQQQQQQQQQQQILQQILQQQLIPCMDVVLQQHNIHGRSQVLQQSSYQLLQE  
LCFQHL.QIPEQ...SQCQAIHNVVHAIILHQQQKQQQQQQKQQPSSQVVSFQQPQQQYPSGQGSFRPSLQNPQAQGSVQPQQLPS  
S...IRNLALQTLPAMCNLYIPPYCTIAPFGIFGTN.

$\alpha$ -A4 nucleotide 852 bp

ATGAAGACATTTCTCATCCTTGCCCTCCTTGCTATCGTGGCGACCACCGCCACAACCTGCAGTTAGAGTTCCAGTGCCACAATTGCA  
GCCACAAAATCCATCTCAGCAACAGTCACAAGAGCAAGTTCCATTGGTACAACAACAATTTCTAGGGCAGCAACAACCATTTTC  
CACCACAACAACCATATCCACAGCCGCAACCATTTCCATCACAACAACCATATCTGCAGCTGCAACCATTTCCGAGCCGCAACTA  
CCATATTCGAGCCACAACCATTTGACCACAACAACCATATCCACAACCGCAACCACAATATTCGCAACCACAACATCCAATTTTC  
ACAGCAGCAGCAGCAGCAACAACAACAACAACAAGAACAACAATACTTCAACAAATTTTGAACAACAACCTGATTCCATGCA  
TGGATGTTGATTGCAGCAACACAACATAGCGCATGGAAGATCACAAGTTTTGCAACAAGTACTTACCAGCTGTTGCAAGAATTG  
TGTGTCAGCACCTATGGCAGATCCCTGAGCAGTCGAGTGCCAGGCCATCCACAATGTTGTTTCATGCTATTATTTCTGCGTCAACA  
ACAAAAACAACAACAACCATCGAGCCAGGTCTCCTTCCAACAGCCTCAGCAACAATATCCATTAGGCCAGGGCTCCTTCCGGC  
CATCTCAGCAAAACCCACAGGCCAGGGCTCTGTCCAGCCTCAACAACCTGCCCCAGTTTCGAGGAAATAAGGAACCTAGCGCTACAG  
ACGCTACCTGCAATGTGCAATGTCTACATCCCTCCATATTGCACCATCGCGCCATTTGGCATCTTTGGTACTAACTAA

$\alpha$ -A4 amino acid 284 aa

MKTFLLLALLAIVATTATTAVRVPVPLVQVPLVQQVFLGQQQPFPPQPPYPPQPPFPSQQPYLQLQVPPQPPQ  
PYSQPQFFRPQPPYPPQPPQYSQPQHPISQQQQQQQQQQQQEQQILQQILQQQLIPCMDVVLQQHNIHGRSQVLQQSTYQLLQEL  
CCQHLWQIPEQSQCQAIHNVVHAIILRQQQKQQQQPSSQVVSFQQPQQQYPLGQGSFRPSQQNPQAQGSVQPQQLPFEEIRNLALQ  
TLPAMCNVYIPPYCTIAPFGIFGTN.

$\alpha$ -A5 nucleotide 921 bp

ATGAAGACATTTCTCATCCTTGCCCTCCTTGCTATCGTGGCGACCACCGCCACAACCTGCAGTTAGAGTTCCAGTGCCACAATTGCA  
GCCACAAAATCCATCTCAGCAACAGCCACAAGAGCAAGTTCCATTGGTACAACAACAATTTCTAGGGCAGCAACAACCATTTTC  
CACCACAACAACCATATCCACAGCCGCAACCATTTCCATCACAACAACCATATCTGCAGCTGCAACCATTTCCGAGCCGCAACTA  
CCATATTCGAGCCACAACCATTTGACCACAACAACCATATCCACAACCGCAACCACAGTATTCGCAACTACAACAACCAATTTTC  
ACAGCAGCAGCAGCAGCAGCAACAACAACAACAACAACAACAACAACAACAACAACAACAACAACAACAACAACAACAACAACA  
AACACAACAACAACAAGAACAACAATCCTTCAACAAATTTTGAACAACAACCTAATTCATGCATGGATGTTGTATTACAGCAA  
CACAACATAGCGCATGGAAGATCACAAGTTTTGCAACAAGTACTTACCAGCTGTTGCAAGAATTGTGTTGTCAGCACCTATGGCA  
GATCCCTGAGCAGTCGAGTGCCAGGCCATCCACAATGTTGTTTCATGCTATTATTTCTGCATCAACAACAACAACAACAACAACA  
AACCATCGAGCCAGGTCTCCTTCCAACAGCCTCAACAACAATATCCATTAGGCCAGGGCTCCTTCCGGCCATCTCAGCAAAACCCA  
CAGGCCAGGGCTCTGTCCAGCCTCAACAACCTGCCCCAGTTTCGAGGAAATAAGGAACCTAGCGCTACAGACGCTACCTGCAATGTG  
CAATGTCTACATCCCTCCATATTGCACCATCGTGCCATTTGGCATCTTCGGTACTAACTGA

$\alpha$ -A5 amino acid 307 aa

MKTFLLLALLAIVATTATTAVRVPVPLVQVPLVQQVFLGQQQPFPPQPPYPPQPPFPSQQPYLQLQVPPQPPQ  
PYSQPQFFRPQPPYPPQPPQYSQLQQPISQQQQQQQQQQQQQQQQQQQQQQQQQQQQQQQQQQQQEQQILQQILQQQLIPCMDVVLQQ  
HNIHGRSQVLQQSTYQLLQELCCQHLWQIPEQSQCQAIHNVVHAIILHQQQKQQQQPSSQVVSFQQPQQQYPLGQGSFRPSQQNP  
QAQGSVQPQQLPFEEIRNLALQTLPAMCNVYIPPYCTIIVPFIFGTN.

$\alpha$ -A6 nucleotide 855 bp

ATGAAGACCTTTCTCATCCTTGCCCTCCTTGCTATCGTGGCGACCACCGCCACAACCTGCAGTTAGAGTTCCAGTGCCACAATTGCA  
GCCACAACATCCATCTCAGCAACAGCCACAAGAGCAAGTTCCATTGGTACAACAACAATTTCTAGGGCAGCAACAACCATTTTC  
CACCACAACAACCATATCCACAGCCGCAACCATTTCCATCACAACAACCATATCTGCAACTACAACCATTTCCGAGCCGCAACTA

CCATATTCGCAGCCACAACCATTTCGACCACAACAACCATATCCACAACCGCAACCACAGTATTCGCAACCACAACAACCAATTC  
ACAGCAGCAGCAGCAGCAGCAACAACAACAACAACAACAACAACAACAATCCTTCAACAAATTTTGAACAACAACACTGATTCCAT  
GCATGGATGTTGTATTGCAGCAACAACATAGCGCATGGAAGATCACAAGTTTTGCAACAAAGTACTTACCAGCTGTTACAAGAA  
TTGTGTTGTGCAGCACCTATGGCAGATCCCTGAGCAGTCGCAGTGCAGGCCATCCACAATGTTGTTTCATGCTATTATTCTGCATCA  
ACAACAAAACCACAACAACAACCATCGAGCCAGGTCTCCTTCCAACAGCCTCTGCAACAATATCCATTAGGCCAGGGCTCCTTCC  
GGCCATCTCAGCAAAACCCACAGGCCCGGGGCTCTGTCCAGCCTCAACAACCTGCCCCAGTTTCGAGGAAATAAGGAACCTAGCGCTA  
CAGACGCTACCCGCAATGTGCAATGTCTACATCCCTCCATATTGCACCATCGCGCCATTTGGCATCTTCGGTACTAACTGA

$\alpha$ -A6 amino acid 285 aa

MKTFLLILALLAIVATTATTAVRVPVPLQLPQHPSQQQPQEQVPLVQQQQFLGQQQPFPPQQPYQPQPFPSQQPYLQLQPFPPQPQL  
PYSQPQFRPQQPYQPQYSPQQPISQQQQQQQQQQQQQQQILQQILQQQLIPCMDVVLQQHNIAGRSQVLQQSTYQLLQE  
LCCQHLWQIPEQSQCQAIHNVVHAIILHQQQKQQQPSSQVVSFQQPLQQYPLGQGSFRPSQQNPQARGSVQPQLPQFEEIRNLAL  
QTLPAMCNVYIPPYCTIAPFGIFGTN.

$\alpha$ -A7 nucleotide 873 bp

ATGAAGACCTTTCTCATCCTTGCCCTCCTTGCTATCGTGGCGACCACCGCCACAACCGCAGTTAGAGTTCAGTGCCACAATTGCA  
GCCACAAAATCCATCTCAGCAACAGCCACAAGAGCAAGTTCATTGGTACAACAACAACAATTTCTAGGGCAGCAACAACATTTTC  
CACCACAACAACCATATCCACAGCTGCAACCATTTCATCACAACAACCATATCTACAGCTGCAACCATTTCCGCAGCCGCAACTA  
CCATATTCGCAGCCACAACCATTTCGACCACAACAACCATATCCACAACCGCAACCACAGTATTCGCAACCACAACAACCAATTTTC  
ACAGCATCAACAGCAGCAGCAGCAACAACAACAACAACAACAACAACAACAATCCTTCAACAAATTTTGAACAACAACACTGATTC  
CATGCATGGATGTTGTATTGCAGCAACAACATAGCGCAAGGAAGATCACAAGTTTTGCAACAAAGTACTTACCAGCTGTTGCAA  
GAATTGTGTTGTCAGCACCTATGGCAGATCCCTGAGCAGTCGCAGTGCAGGCCATCCACAATGTTGTTTCATGCTATTATTCTGCA  
TCAACAACAACAACAACAACAACAACAACAACAACAACAACCATCGAGCCAGGTCTCCTTCCAACAGCCTCAGCAACAATATCCAT  
TAGGCTAGGGCTCCTTCCGGCCATCTCAGCAAAACCCACAGGCCAGGGCTCTGTCCAGCCTCAACAACCTGCCCCAGTTTCGAGGAA  
ATAAGGAACCTAGCGCTACAGACACTACCTGCAATTTGCAATGTCTACATCCCTCCATATTGCACCATCGCGCCATTTGGCATCTT  
CGGTACTAACTGA

$\alpha$ -A7 amino acid 291 aa

MKTFLLILALLAIVATTATTAVRVPVPLQLPQNPSQQQPQEQVPLVQQQQFLGQQQTFPPQQPYQPQPFPSQQPYLQLQPFPPQPQL  
PYSQPQFRPQQPYQPQYSPQQPISQHQQQQQQQQQQQQQQILQQILQQQLIPCMDVVLQQHNIAGRSQVLQQSTYQLLQE  
ELCCQHLWQIPEQSQCQAIHNVVHAIILHQQQKQQQQQQQPSSQVVSFQQPQQQYPLG.GSFRPSQQNPQAQGSVQPQLPQFEE  
IRNLALQTLPAICNVYIPPYCTIAPFGIFGTN.

$\alpha$ -A8 nucleotide 864 bp

ATGAAGACCTTTCTCATCCTTGCCCTcCCTGCTATCGTGGCGACCACCGCCACAACCTGCAGTTAGAGTTCAGTGCCACAATTGCA  
GCCACAAAATCCATCTCAGCAACAGCCACAAGAGCAAGTTCATTGGTACAACAACAACAATTTCTAGGGCAGCAACAACCATTTTC  
CACCACAACAACCATATCCACAGCCGCAACCATTTCATCACAACAACCATATCTGCAGCTGCAACCATTTCCGCAGCCGCAACTA  
CCATATTCGCAGCCACAACCATTTCGACCACAACAACCATATCCACAACCGCAACCACAGTATTCGCAACCACAACAACCAATTTTC  
ACAGCAGCAGCAGCAGCAGCAACAACAACAACAACAACAACAACAACAACAACAACAACAACAACAACAACAACAACAACAACAACA  
TGATTCCATGCATGGATGTTGTATTGCAGCAACAACATAGCGCATGGAAGATCACAAGTTTTGCAACAAAGTACTTACCAGCTG  
TTGCAAGAATTGTGTTGTCAGCACCTATGGCAGATCCCTGAGCAGTCGCAGTGCAGGCCATCCAAAATGTTGTTTCATGCTATTAT  
TCTGCATCAACAACAACAACAACAACAACAACCATCGAGCCAGGTGTCTTCCAACAGCCTCTGCAACAATATCCATTAGGCCAGG  
GCTCCTTCCGGCCATCTCAGCAAAACCCACAGGACCAGGGCTCTGTCCAGCCTCAACAACCTGCCCCAGTTTCGAGGAAATAAGGAAC  
CTAGCGCTACAGATGCTACCTGCAATGTGCAATGTCTACATCCCTCCATATTGCACAATCGCGCCATTTGGCATCTTCGGTACTAA  
CTGA

$\alpha$ -A8 amino acid 288 aa

MKTFLLILALPAIVATTATTAVRVPVPLQLPQNPSQQQPQEQVPLVQQQQFLGQQQPFPPQQPYQPQPFPSQQPYLQLQPFPPQPQL  
PYSQPQFRPQQPYQPQYSPQQPISQQQQQQQQQQQQQQQKQILQQILQQQLIPCMDVVLQQHNIAGRSQVLQQSTYQL  
LQELCCQHLWQIPEQSQCQAIQNVVHAIILHQQQKQQQPSSQVVSFQQPLQQYPLGQGSFRPSQQNPQDQGSVQPQLPQFEEIRN  
LALQMLPAMCNVYIPPYCTIAPFGIFGTN.

$\alpha$ -A9 nucleotide 894 bp

ATGAAGACCTTTCTCATCCTTGCCCTCCTTGCTATCGTGGCGACCACCGCCACAACCTGCAGTTAGAGTTCCAGTGCCACAATTGCA  
GCCACAAAATCCATCTCAGCAACAGCCACAGGAGCAAGTTCAGTGGTACAACAACAACAATTTCTAGGGCAGCAACAACCATTTCC  
CACCACAACAACCATATCCACAGCCGCAACCATTTCCATCACAACAACCATATCTGCAGCTGCAACCATTTCCGCAGCCGCAACTA  
CCATATTCGCAGCCACAACCATTTCAACCACAACAACCATATCCACAACCGCAACCACAGTATTCGCAACCACAACAACAATTTCC  
ACAGCAGCAGCAGCAGCAGCAGCAGCAGCAACAACAACAACAACAACAACAACAACAACAACAACAACAACAACAACAACAACAACA  
TTTTGCAACAACAACCTGATTCCATGCATGGATGTTGTATTGCAGCAACAACAACAACAACAACAACAACAACAACAACAACAACA  
AGTACTTACCAGCTGTTGCAAGAATTTGTGTTGTCTAGCAGCCTATGGCAGATCCCTGAGCAGTGCAGTGCAGGCCATCCACAATGT  
TGTTCATGCTATTATTTCTGCATCAACAACAACAACAACAACAACAACAACAACAACAACAACAACAACAACAACAACAACAACA  
AGCCTCAGCAACAATATCCATTAGGCCAGGGCTCCTTCCGGCCATCTCAGCAAAAACCCACAGGCCAGGGCTCTGTCCAGCCTCAA  
CAACTGCCCCAGTTCGAGGAAATAAGGAACCTAGCGCTACAGACACTACCTGCAATTTGCAATGTCTACATCCCTCCATATTGCAC  
CATCGCGCCATTTGGCATCTTCGGTACTAACTGA

$\alpha$ -A9 amino acid 298 aa

MKTFLLILLALLAIVATTATTAVRVPVLPQLPQNPSQQQPQEQVPLVQQQFLGQQQFPFPQQPYQPQPFPSQQPYLQLQFPFPQPL  
PYSQPQFPFPQQPYQPQPYSPQYSPQEPISQQQQQQQQQQQQQQQQQQQQQQILQQILQQQLIPCMDVVLQQHNIHQGRSQVLQQ  
STYQLLQELCCQHLWQIPEQSQCQAIHNVVHAILLHQQQKQQQQPSSQVFSFQQPQQYPLGQGSFRPSQQNPDQGSVQPPQ  
QLPQFEEIRNLALQTLPAICNVYIPYCTIAPFGIFGTN.

$\alpha$ -A10 nucleotide 840 bp

ATGAAGACCTTTCTCATCCTTGCCCTCCTTGCTATCGTGGCGACCACCGCCACAACCTGCAGTTAGAGTTCCAGTGCCACAATTGCA  
GCCACAAAATCCATCTCAGCAACAGCCACAAGAGCAAGTTCATTGGTACAACAACAACAATTTCTAGGGCAGCAACAACCATTTCC  
CACCACAACAACCATATCCACAGCCGCAACCATTTCCATCACAACAACCATATCTGCAGCTGCAACCATTTCCGCAGCCGCAACTA  
CCATATTCGCAGCCACAACCATTTGACCACAACAACCATATCCACAACCGCAACCACAGTATTCGCAACCACAAGAACAATTTCC  
ACAGCAGCAGCAACAACAACAACAACAACAACAACAACAACAACAACAACAACAACAACAACAACAACAACAACAACAACAACAACA  
TGCAGCAACAACAACAACAACAACAACAACAACAACAACAACAACAACAACAACAACAACAACAACAACAACAACAACAACAACA  
CTATGGCAGATCCCTGAGCAGTGCAGTGCAGGCCATCCAAAATGTTGTTTCATGCTATTATTTCTGCATCAACAACAACAACAACA  
ACAACAACCATCGAGCCAGGTCTCCTTCCAACAGCCTCTGCAACAATATCCATTAGGCCAGGGCTCCTTCCGGCCATCTCAGCAAAA  
ACCCACAGGACCAGGGCTCTGTCCAGCCTCAACAACCTGCCCCAGTTCGAGGAAATAAGGAACCTAGCGCTACAGACGCTACCTGCA  
ATGTGCAATGTCTACATCCCTCCATATTGCACCATCGCGCCATTTGGCATCTTCGGTACTAACTGA

$\alpha$ -A10 amino acid 280 aa

MKTFLLILLALLAIVATTATTAVRVPVLPQLPQNPSQQQPQEQVPLVQQQFLGQQQFPFPQQPYQPQPFPSQQPYLQLQFPFPQPL  
PYSQPQFPFPQQPYQPQPYSPQYSPQEPISQQQQQQQQQQQQQQQQQQQQQQILQQILQQQLIPCMDVVLQQHNIHQGRSQVLQQ  
LWQIPEQSQCQAIQNVVHAILLHQQQKQQQQPSSQVFSFQQPQQYPLGQGSFRPSQQNPDQGSVQPPQQLPQFEEIRNLALQTLPA  
MCNVYIPYCTIAPFGIFGTN.

$\alpha$ -B1 Nucleotide 909 bp

ATGAAGACCTTTCTCATCTTTTCCCTCCTTGCTATCGTGGCGACCCTGCAACAACCTGCAGTTAGAGTTCCAGTGCCACAATTGCA  
GCCGCAAAAATCCATCTCAGCAACAACCACAAGAGCAAGTTCGGTGGTGAACAACAACAATATCCAGGGCAGCAACAACCATTTCC  
CACCACAACAACCATATCCGCAGCCGCAACCATTTCCATCACAACAACCATTTCTGCAGCCGCAACCATTTCTGTACAACCTACCA  
TATCCGCAGCCACAACCATTTCCACCACAACAACCATATCCACAACCGCAACCACAGTATCCGCACCAACAACAACAATTTCCACA  
GCAACAAGCGCAACAAGCACAACAACAACAACAACAACAACAACAACAACAACAACAACAACAACAACAACAACAACAACAACAACA  
AGTAGTTACCAACTGTTGCAACAATATGTTGTCAACGGTTGTGGCAGATCCCCGAGCAGTCCGGTGCCAAGCCATCCACAATGT  
CGTTCATGCTATTATTTCTGCAACAACAACAACAACAACAACAACAACAACAACAACAACAACAACAACAACAACAACAACAACA  
CCTACCAGCAGCCTCAGCAACAATATCCATCGGGCCAGGGCTCCTTCCAGCCATCTCAGCAGAACCATAGGCCAGGGCTCTGTCT  
CAGTCTCAACAACCTCCCCAGTTCGAGGAAATAAGGAACCTAGTGTGCAGACGCTACCGCAATGTGCAATGTCTACATCCCTCC  
ATATTGCTCGACCACCATTGCGCCATCTGGCATCTTCGGTACTAACTGA

$\alpha$ -B1 amino acid 303 aa

MKTFLIFSLLAIVATTATTAVRVPVPLQLPQNPSQQQPQEQVPLVQQQQYPGQQQPFPPQQPYQPQPFPSQQPFLQPQPFLQLLP  
YPQPQFPFPQQPYQPQPQYQPQQPISQQQAQQAQQQQQQQQQQ.Q.QQQQILQQILQQQQLIPCRDVLVQQHNI AHASSQVLQQ  
SSYQLLQQQLCCQRLWQIPEQSRQAIHNVVHAIILQQQQQQQQQQQQQQQQQQPSSQVSYQQPQQQYPSGQGSFQPSQQNP.A.QGSV  
QSQQLPQFEEIRNLVLQTL PAMCNVYIPPYCSTTIAPSGIFGTN.

$\alpha$ -B2 nucleotide 885 bp

ATGAAGACCTTTTCTCATCTTTTCCCTCCTTGCTATCGTGGCGACCACTCCAACAACCTGCAGTTAGATTTCCAGTGCCACAATTGCA  
GCCGCAAAAATCCATCTCAGCAACAACCAAGAGCAAGTTCCGTTGGTGCAACAACCTACAATATCCAAGGCAACAACAACCATTTTC  
CACCACAACAGCCATATCCGCAGCCGCAACCATTTCCATCACAACAACCATTTGCCGCAACGGCAACCATTTCTGCCACAACCTACCA  
TATCCGCAGCCACAACCATTTCCACCACAACAACCATATCCACAACCGCAACCACAGTATCCACAACCACAACAACCAATTTTCCACA  
GCAACAAGCACAATAAGCACAACAACAACAACAACAACAACAACAACAACAACAACAACAACAACAACAACAACAACAACAACAACAACA  
AACAACTAATTCCATGCAGGGATGTCGTCTTGCAACAACAACAACAACAACAACAACAACAACAACAACAACAACAACAACAACAACA  
CAACTGTTGCAACAATTATGTTGTCAACGGTTGTGGCAGATCCCCGAGCAGTCGCGGTGCCAAGCCATCCACAATGTTGTTTCATGC  
TATTATTTCTGCAACAACAACAACAACAACAACAACAACAACAACAACAACCGTCGAGCCAGGTCTCCTACCAGCAGCCTCAGCAACAAT  
ATCCATCGGGCCAGGGCTCCTTCCAGCCATCTCAGCAGAACCATAGGCCTAGGGCTCTGTCCAGTCTCAACAACCTCCCCAGTTC  
GAGGAAATAAGGAACCTAGCGCTGCAGACGCTACCGGCAATGTGCAATGTCTACATCCCTCCATATGCTCGACCACCATTGGCC  
ATCTGGCATCTTTCGGTACTAACTGA

$\alpha$ -B2 amino acid 295 aa

MKTFLIFSLLAIVATTPTTAVRFPVPLQLPQNPSQQQPQEQVPLVQQQLQYPRQQQPFPPQQPYQPQPFPSQQPLPQRQPFLPQLP  
YPQPQFPFPQQPYQPQPQYQPQQPISQQQAQ.AQQQQQQQQQQQQQQQILQQILQQQQLIPCRDVLVQQHNI AHASSQVLQQSSY  
QLLQQQLCCQRLWQIPEQSRQAIHNVVHAIILQQQQQQQQQQQQQQPSSQVSYQQPQQQYPSGQGSFQPSQQNP.A.GSVQSQQLPQF  
EEIRNLALQTL PAMCNVYIPPYCSTTIAPSGIFGTN.

$\alpha$ -B3 nucleotide 993 bp

ATGAAGACCTTTTCTCATCCTTTCCCTCCTTGCTATCGTGGCGACCACTGCCACAACCTGCAGTTAGATTTCCAGTGCCACAATTGCA  
GCCGCAAAAATCCATCTCAGCAACAACCAAGAGCAAGTTCCGTTGGTGCAACAACCTACAATATCCAGGGCAACAACAACCATTTTC  
CACCACAACAGCCATATCCGCAGCCGCAACCATTTCCATCACAACAACCATTTGCCGCAACCGCAACCATTTCTGCCACAACCTACCA  
TATCCGCAGCCACAACCATTTCCACCACAACAACCATATCCACAACCGCAACCACAGTATCCGCAACCACAACAACCAATTTTCCACA  
GCAACAAGCACAACAAGCACAACAACAACAACAACAACAACAACAACAACAACAACAACAACAACAACAACAACAACAACAACAACAACA  
TGCAACAACAACAACCTGATTCCATGCAGGGATGTCGTCTTGCAACAACAACAACAACAACAACAACAACAACAACAACAACAACAACA  
AGTAGTTACCAACTGTTGCAACAATTATGTTGTCAACGTTTGTGGCAGATCCCCGAGCAGTCGCGGTGCCAAGCCATCCACAATGT  
CGTTCATGCTATTATTTCTGCAACAACAACAACAACAACAACAACAACAACAACAACAACAACAACAACAACAACAACAACAACAACA  
AACACAACAACAACAACAACAACAACAACAACAACAACAACAACAACAACAACAACAACAACAACAACAACAACAACAACAACAACA  
TACCAGCAGCCTCAGCAACAATATCCATCGGGCCAGGGATCCTTCCAGCCATCTCAGCAGAACCACAGGCCCAGGCTCTGTCCA  
GCCTCAACAACCTCCCAGTTCCGAGGAAATAAGGAATCTAGCACGGCAGACGCTACCGGCAATGTGCAATGTCTACATCCCTCCAT  
ATTGCTCGACCACCATTGCGCCATCTGGCATCTTTGGTACTAACTGA

$\alpha$ -B3 amino acid 331 aa

MKTFLILSLLAIVATTATTAVRFPVPLQLPQNPSQQQPQEQVPLVQQQLQYPGQQQPFPPQQPYQPQPFPSQQPLPQPQPFLPQLP  
YPQPQFPFPQQPYQPQPQYQPQQPISQQQAQQAQQQQQQQQQQQQQQQQQQILQQILQQQQLIPCRDVLVQQHNI AHASSQVLQQ  
SSYQLLQQQLCCQRLWQIPEQSRQAIHNVVHAIILQQQQQQQQQQQQQQQQQQQQQQQQQQQQQQQQQQQQQQQQQQQQPSSQV  
YQQPQQQYPSGQGSFQPSQQNPQAQASVPQQLPQFEEIRNLARQTL PAMCNVYIPPYCSTTIAPSGIFGTN.

$\alpha$ -B4 nucleotide 546 bp

CAACAACAACAACAACAACAACAACAACAACAACAACAACAACAACAACAACAACAACAACAACAACAACAACAACAACAACAACA  
CGTCTTGAACAACAACAACAACAACAACAACAACAACAACAACAACAACAACAACAACAACAACAACAACAACAACAACAACAACA  
AACGGTTGTGGCAGATCCCCGAGCAGTCGCGGTGCCAGCCATCCACAATGTCTCCATGCTATTATTCTGCAACAACAACAACAACA  
CAACAACAACAACAACAACAACAACAACAACAACAACAACAACAACAACAACAACAACAACAACAACAACAACAACAACAACAACA  
ACAGTATCCATCAGGCCAGGGCTCCTTCCAGCCATCTCAGCAAAAACCACAGGCCAGGGCTCTGTCCAGCCTCAACAACCTGCC  
AGTTCGAGGAAATAAAGAACCTAGCGCTGCAGACGCTACCGGCAATGTGCAATTTCTACATCCCTCCATATTGCTCGACCACCATT  
GCGCCATTTGGCATCTTTCGGTACTAACTGA

$\alpha$ -B4 amino acid 182 aa

QQQQQQILQQILQQILQQQQQLIPCRDVLKQHNIAHASSQVLQQSSYQLLQQLCCQRLWQIPEQSRCQAIHNVVHAIILQQQQQ  
QQQQQQQQQQQQQQPSSQISLQQPQQQYPSGQGSFQPSQQNPQAQGSVQPQQLPQFEEIKNLALQTLPAMCNFYIPPYCSTTI  
APFGIFGTN.

$\alpha$ -B5 nucleotide 437 bp

TGATTCCATGCAGGGATGTCGTCTTGAACAACACAACATAGCGCATGCAAGCTCACAAGTATTGCAACAAAGTAGTTACCAACTA  
TTGCAACAATTATGTTGTCAACGGTGTGGCAGATCCCCGAGCAGTCGCGGTGCCAGGCCATCCACAATGTCGTCCATGCTATTAT  
TCTGCAACAACAACAACAACAACAACAACAACAACAACAACAACAACAACAACAACAACAACAACAACAACAACAACCCTCGAGCCAGATCT  
CCCTCCAGCAGCCTCAACAACAGTATCCATCAGGCCAGGGCTCCTTCCAGCCATCTCAGCAAAACCCACAGGCCAGGGCTCTGTC  
CAGCCTCAACAACCTGCCCCAGTTCGAGGAAATAAAGAACCTAGCGCTGCAGACGCTACCGGCAATGTGCAATTTCTACATCCCTCC  
ATATTGC

$\alpha$ -B5 Amino acid 145 aa

IPCR DVLKQHNIAHASSQVLQQSSYQLLQQLCCQRLWQIPEQSRCQAIHNVVHAIILQQQQQQQQQQQQQQQQQQQQPSSQIS  
LQQPQQQYPSGQGSFQPSQQNPQAQGSVQPQQLPQFEEIKNLALQTLPAMCNFYIPPYC

$\alpha$ -B6 nucleotide 957 bp

ATGAAGACCTTTCTCATCCTTGCCCTCGTGGCGACCACCGCCACAACCTGCAGTTAGAGTTCAGTGCCACAATTGCAGCCACAAAA  
TCCATCTCAGCAACAGCCACAAGAGCAAGTTCATTGGTACAACAACAACAATTTCAGGGCAGCAACAACAATTTCACCACAAC  
AGCCATATCCGAGCCGCAACCATTTCCATCACAACAACCATATCTGCAGCTGCAACCATTTCCGAGCCGCAACCATTTCTGCCA  
CAACTACCATATCCGAGCCGCAATCATTTCACCACAACAACCATATCCACAACAGCGACCAAGTATCTACAACCACAACAACC  
AATTTGCGAGCAACAAGCACAACAACAACAACAACAACAACAACAACAACAACAACAACAACAACAACAACAACAACAACAACA  
AAATTTGCAACAACAACCTGATTCCATGCAGGGATGTTATCTTGAACAACAACAACAACAACAACAACAACAACAACAACAACA  
CAAAGTACTTACCAGCTATTGCAACAATTGTGTTGTCAACAACCTGTTGCAGATCCCTGAGCAGTCGAGGTGCCAAGCCATACATA  
TGTGTTTCATGCTATTATTATGCATCAACAAGAACAACAACAACAGTTGCAACAACAACAACAACAGCAACTGCAACAACAACA  
AACACAACAACAACAACAACAACAACAACAACAACAACCTCAAGCCAGGTCTCCTTCCACAGCCTCAGCAGCAATATCCATCAAGCCAG  
GTCTCCTTCCAGCCATCTTAGCTAAACCCACAAGCTCAGGGCTCCGTCCAACCTCAACAACCTGCCCCAGTTCGCGGAAATAAGGAA  
CCTAGCGCTACAGACGCTACCTGCAATGTGCAATGTCTACATCCCTCCACATTGCTCGACCACCATTTGCGCCATTTGGCATCTTTG  
GTACCAACTGA

$\alpha$ -B6 amino acid 319 aa

MKTFLLILALVATTATTAVRVPVLPQPNPSQQQPQEQVPLVQQQFPGQQQFPPQQPYPQPQFPFSSQQPYLQLQFPFPQPFLP  
QLPYPQPQSFPPQQPYPQQRPKYLQPPQISQQQAQQQQQQQQQQQQQQQQQQQQILQQILQQQLIPCRDVLKQHNIAHASSQVLQ  
QSTYQLLQQLCCQQLLQIPEQSRCQAIHNVVHAIIMHQEQEQQQQLQQQQQQQLQQQQQQQQQQQQQQPSSQVVSFQPPQQQYPSQ  
VSFQPS.LNPPQAQGSVQPQQLPQFAEIRNLALQTLPAMCNVYIPPHCSTTIAPFGIFGTN.

$\alpha$ -B7 nucleotide 942 bp

ATGAAGACCTTTCTCATCCTTGCCCTCCTTGCTATCGTGGCGACCACCGCCACAACCTGCAGTTAGAGTTCAGTGCCACAATTGCA  
GCCACAAAATCCATCTCAGCAACAGCCACAAGAGCAAGTTCATTGGTACAACAACAACAATTTCAGGGCAGCAACAACAATTTC  
CACCACAACAGCCATATCCGAGCCGCAACCATTTCCATCACAACAACCATATCTGCAACTGCAACCATTTCCGAGCCGCAACCA  
TTTCCGCCACAACCTACCATATCCGAGCCGCAATCATTTCACCACAACAACCATATCCACAACAGCAACCACAGTATCTACAACC  
ACAACAACCAATTTGCGAGCAACAAGCACAACAACAACAACAACAACAACAACAACAACAACAACAACAACAACAACAACAACA  
TTTTGCAACAACAACCTGATTCCATGCAGGGATGTTGTCTTGAACAACAACAACAACAACAACAACAACAACAACAACAACA  
AGTACTTACCAGCTATTGCAACAATTGTGTTGTCAACAACCTGTTGCAGATCCCTGAGCAGTCGAGGTGCCAAGCCATCCATAATGT  
TGCTCATGCTATTATTATGCATCAACAACAACAACAACAACAACAACAACAACAACAACAACAACAACAACAACAACAACAACA  
AACACAACGACAACAACCGTTCGAGCCAGGTCTCCTTCCAACAGCCTCAGCAGCAATATCCATCAAGCCAGGTCTCCTTCCAGCCA  
TCTCAGCTAAACCCACAGGCTCAGGGCTCCGTCCAACCTCAACAACCTGCCCCAGTTCGCGGAAATAAGGAACCTAGCGCTACAGAC  
GCTACCTGCAATGTGCAATGTCTACATCCCTCCACATTGCTCGACCACCATTTGCGCCATTTGGCATCTTTGGTACCAACTGA

$\alpha$ -B7 amino acid 314 aa

MKTFLLILALLAI VATTATTAVRVPVLPQPNPSQQQPQEQVPLVQQQFPGQQQFPPQQPYPQPQFPFSSQQPYLQLQFPFPQP  
FPPQLPYPQPQSFPPQQPYPQQRPKYLQPPQISQQQAQQQQQQQQQQQQQQQQQQQQILQQILQQQLIPCRDVLKQHNIAHASSQVLQQ  
STYQLLQQLCCQQLLQIPEQSRCQAIHNVVHAIIMHQEQEQQQQLQQQQQQQLQQQRQQPSSQVVSFQPPQQQYPSQVVSFQ  
SFLNPPQAQGSVQPQQLPQFAEIRNLALQTLPAMCNVYIPPHCSTTIAPFGIFGTN.

$\alpha$ -B8 nucleotide 951 bp

ATGAAGACCTTTTCTCATCCTTGCCCTCGTGGCGACCACCGCCACAACCTGCAGTTAGAGTTCAGTGCCACAATTGCAGCCAAAAA  
TCCATCTCAGCAACAGCCACAAGAGCAAGTTCATTGGTACAACAACAATTTCCAGGGCAGCAACAACAATTTCCACCACAAC  
AGCCATATCCGCAGCCGCAACCATTTCCATCACAACAACCATATCTGCAGCTGCAACCATTTCCGCAGCCGCAACCATTTCTGCCA  
CAACTACCATATCCGCAGCCGCAATCATTCCACCACAACAACCATATCCACAACAGCGACCAAAGTATCTACAACCACAACAACC  
AATTTTCGCAGCAACAAGCACAACAACAACAACAACAACAACAACAACAACAACAACAACAACAACAACAACAACAACAATCCTTC  
AACAAATTTTGCAACAACAACCTGATTCATGCAGGGATGTTGTCTTGCAACAACAACATAGCGCATGCAAGCTCACAAGTTTTG  
CAACAAAGTACTTACCAGCTATTGCAACAATGTGTGTGCAACAACCTGTTGCAGATCCCTGAGCAGTCGAGGTGCCAAGCCATCCA  
TAATGTTGTTTCATGCTATTATTATGCATCAACAAGAACAACAACAACAGTTGCAACAACAACAACAACAGCAACTGCAACAACAAC  
AACACAACAACAACAACAACAACAACCGTCAAGCCAGGTCTCCTTCCAACAGCCTCAGCAGCAATATCCATCAAGCCAGGTCTCC  
TTCAGCCATCTCAGCTAAACCCACAAGCTCAGGGTCCGTCCAACCTCAACAACCTGCCCCAGTTCGCGGAAATAAGGAACCTAGC  
GCTACAGACGCTACCTGCAATGTGCAATGTCTACATCCCTCCACATTGCTCGACCACCATTGCGCCATTTGGCATCTTTGGTACCA  
ACTGA

$\alpha$ -B8 amino acid 317 aa

MKTFLLILALVATTATTAVRVPVPLQPKNPSQQQPQEQVPLVQQQQFPGQQQFPPQQPYQPQPFPSQQPYLQLQPPFPQPFLP  
QLPYPQPSFPPQQPYPQQRPKYLPQQPISQQQAQQQQQQQQQQQQQQQQQQILQQILQQQLIPCRDVLVQQHNIHASSQVLQ  
QSTYQLLQQLCCQQLLQIPEQSRQAIHNVVHAIIMHQEQQQQLQQQQQQQLQQQQQQQQQQPSSQVSVFQQPQQQYPSQVSV  
FQPSQLNPQAQGSVQPQQLPQFAEIRNLALQTLPAMCNVYIPPHCSTTIAPFGIFGTN.

$\alpha$ -B9 nucleotide 942 bp

ATGAAGACCTTTTCTCATCCTTGCCCTCCTTGCTATCGTGGCGACCACCGCCACAACCTGCAGTTAGAGTTCAGTGCCACAATTGCA  
GCCACAAAATCCATCTCAGCAACAGCCACAAGAGCAAGTTCATTGGTACAACAACAATTTCCAGGGCAGCAACAACAATTTTC  
CACCACAACAGCCATATCCGCAGCCGCAACCATTTCCATCACAACAACCATATCTGCAACTGCAACCATTTCCGCAGCCGCAACCA  
TTTCCGCCACAACCTACCATATCCGCAGCCGCAATCATTCCACCACAACAACCATATCCACAACAGCAACCCACAGTATCTACAACC  
ACAACAACCAATTTTCGCAGCAACAAGCACAACAACAACAACAACAACAACAACAACAACAACAACAACAACAACAATCCTTCAACAAA  
TTTTGCAACAACAACCTGATTCCATGCAGGGATGTTGTCTTGCAACAACAACATAGCGCATGCAAGCTCACAAGTTTTGCAACAA  
AGTACTTACCAGCTATTGCAACAATGTGTGTGCAACAACCTGTTGCAGATCCCTGAGCAGTCGAGGTGCCAAGCCATCCATAATGT  
TGCTCATGCTATTATTATGCATCAACAACAACAACAACAAGAACAACAACAACAGTTGCAACAACAACAACAGCAGCAACTGC  
ATCAACAACGACAACAACCTCAGCCAGGTCTCCTTCCAACAGCCTCAGCAGCAATATCCATCAAGCCAGGTCTCCTTCCAGCCA  
TCTCAGCTAAACCCACAGGCTCTGTCCAACCTCAACAACCTGCCCCAGTTCGCGGAAATAAGGAACCTAGCGCTACAGCA  
GCTACCTGCAATGTGCAATGTCTACATCCCTCCACATTGCTCGACCACCATTGCGCCATTTGGCATCTTTGGTACCAACTGA

$\alpha$ -B9 amino acid 314 aa

MKTFLLILALLAIVATTATTAVRVPVPLQPKNPSQQQPQEQVPLVQQQQFPGQQQFPPQQPYQPQPFPSQQPYLQLQPPFPQP  
FPPQLPYPQPSFPPQQPYPQQRPKYLPQQPISQQQAQQQQQQQQQQQQQQQQILQQILQQQLIPCRDVLVQQHNIHASSQVLQ  
STYQLLQQLCCQQLLQIPEQSRQAIHNVVHAIIMHQEQQQQLQQQQQQQLHQRRQQPSSQVSVFQQPQQQYPSQVSVFQ  
SQLNPQAQGSVQPQQLPQFAEIRNLALQTLPAMCNVYIPPHCSTTIAPFGIFGTN.

$\alpha$ -B10 nucleotide 942 bp

ATGAAGACCTTTTCTCATCCTTGCCCTCCTTGCTATCGTGGCGACCACCGCCACAACCTGCAGTTAGAGTTCAGTGCCACAATTGCA  
GCCACAAAATCCATCTCAGCAACAGCCACAAGAGCAAGTTCATTGGTACAACAACAATTTCCAGGGCAGCAACAACAATTTTC  
CACCACAACAGCCATATCCGCAGCCGCAACCATTTCCATCACAACAACCATATCTGCAACTGCAACCATTTCCGCAGCCGCAACCA  
TTTCCGCCACAACCTACCATATCCGCAGCCGCAATCATTCCACCACAACAACCATATCCACAACAGCAACCCACAGTATCTACAACC  
ACAACAACCAATTTTCGCAGCAACAAGCACAACAACAACAACAACAACAACAACAACAACAACAACAACAACAACAATCCTTCAACAAA  
TTTTGCAACAACAACCTGATTCCATGCAGGGATGTTGTCTTGCAACAACAACATAGCGCATGCAAGCTCACAAGTTTTGCAACAA  
AGTACTTACCAGCTATTGCAACAATGTGTGTGCAACAACCTGTTGCAGATCCCTGAGCAGTCGAGGTGCCAAGCCATCCATAATGT  
TGCTCATGCTATTATTATGCATCAACAACAACAACAACAAGAACAACAACAACAGTTGCAACAACAACAGCAGCAGCAACTGC  
AACACAATGACAACAACCGTTCAGCCAGGTCTCCTTCCAACAGCCTCAGCAGCAATATCCATCAAGCCAGGTCTCCTTCCAGCCA  
TCTCAGCTAAACCCACAGGCTCCGTCCAACCTCAACAACCTGCCCCAGTTCGCGGAAATAAGGAACCTAGCGCTACAGCA  
GCTACCTGCAATGTGCAATGTCTACATCCCTCCACATTGCTCGACCACCATTGCGCCATTTGGCATCTTTGGTACCAACTGA

$\alpha$ -B10 amino acid 314 aa

MKTFLLILALLAIVATTATTAVRVPVPLQPKNPSQQQPQEQVPLVQQQQFPGQQQFPPQQPYQPQPFPSQQPYLQLQPPFPQP  
FPPQLPYPQPSFPPQQPYPQQRPKYLPQQPISQQQAQQQQQQQQQQQQQQQQILQQILQQQLIPCRDVLVQQHNIHASSQVLQ

STYQLLQQLCCQQLLQIPEQSRQAIHNVHAHAIIMHQOQQOQQEQOQQQLQOQQOQQQLQQO .QQPSSQVVSFQQPQQQYPSSQVFFQP  
SQLNPPAQGSVQPPQQLPQFAEIRNLALQTLPAMCNVYIPPHCSTTIAPFGIFGTN .

$\alpha$ -B11 nucleotide 879 bp

ATGAAGACCTTTTCTATCCTTGCCCTCCTTGCTATCGTGGCGACCACCACCACAACCTGCAGTTAGAGTTCCAGTGCACATAATTGCA  
GCCACAAAATCCATCTCAGCAACAACCACAAGAGCAAGTTCATTGGTGAACAACAACAATTTCTAGGGCAGCAACAACAACAAT  
TTCCAGGGCAACAACAACCATTTCACCACAACAGCCATATCCGAGCCGCAACCAATTTCTGCCACAACCTACCATATCCGAGCCG  
CAACCATTTCACCACAACAATCATATCCACAACCACAACCACAATATCCGCAACCACAACAACCAATTTTCGACAGCAACAAGCACA  
ACTACAACAACAACAACAACAACAACAACAACAACAACAACAACAACAACAACAATCCTTCAACAATTTCTGCAACAACAACCTGATTCCATGCAGGG  
ATGTCGTCTTGCAACAACCAATATAGCACATGCAAGCTCAAAGTATCGCAACAAGTTACCACTGTTGCAACAATTATGTTGT  
CTGCAACTGTGGCAGACCCCGAGCAGTCACGGTCCAAGCCATCCACAATGTCAATCATGCTATTATTTGTCATCATCAACAACA  
ACAACAACAACAACAACAACAACAACAACAACAACAACCCTGAGCCAGGTCCTACCAGCAGCCTCAGCAACAATATCCAT  
CAGGCCAGGGCTTCTTCCAGCCATCTCAGCAAAACCCACAGGCCAGGGCTTTGTCCAACCTCAGCAACTGCCGAGTTCGAGGAA  
ATAAGGAACCTAGCGTGCAGACGCTACCAGCAATGTGCAATGTCTACATCCCTCCATATTGCTCGACCACCATTGCGCCATTG  
CATCATGAGTACTAACTGA

$\alpha$ -B11 amino acid 293 aa

MKTFLILALLAIVATTTTTAVRVPVLPQNPSSQQQPQEQVPLVQQQQFLGQQQQQFPQQQPPFPQQPPYPQPQPFLPQLPYPQP  
QPPFPQQSYPPQPYPQPQQPISQQQAQLQQQQQQQQQQQQQILQQILQQQLIPCRDVVLLQPNIAHASSKVSQQSYQLLQQLCC  
LQLWQTPEQSRQAIHNVIAHAIILHHQQOQQOQQOQQOQQQPPSSQVSYQQPQQQYPSGGQGFQPSQQNPQAQGFVQPQLPQFEE  
IRNLALQTLPAMCNVYIPPYCSTTIAPFGIMSTN .

$\alpha$ -B12 nucleotide 897 bp

ATGAAGACCTTTTCTATCCTTGCCCTCCTTGCTATCGTGGCGACCACCACCACAACCTGCAGTTAGAGTTCCAGTGCACATAATTGCA  
GCCACAAAATCCATCTCAGCAACAACCACAAGAGCAAGTTCATTGGTGAACAACAACAATTTCTAGGGCAGCAACAACAACAAT  
TTCCAGGGCAACAACAACCATTTCACCACAACAGCCATATCCGAGCCGCAACCAATTTCTGCCACAACCTACCATATCCGAGCCG  
CAACCATTTCACCACAACAATCATATCCACAACCACAACCACAATATCCGCAACCACAACAACCAATTTTCGACAGCAACAAGCACA  
ACTACAACAACAACAACAACAACAACAACAACAACAACAACAACAACAACAACAATCCTTCAACAATTTCTGCAACAACAAC  
TGATTCCATGYAGGGATGTGCTCTTGCAACAACCAACATAGCACATGCAAGCTCAAAGTATYGAACAAGTTACCAACTGTTG  
CAACAATTATGTTGTCAGCAACTGTGGCAGACCCCCGAGCAGTCACGGTGCCAAGCCATCCACAATGTCAATCATGCTATTATTTT  
GCATCAACAACAACAACAACAACAACAACAACAACAACAACAACAACAACAACAACCCTGAGCCAGGTCCTTACCAGCAGC  
CTCAGCAACAATATCCATCAGGCCAGGGCTCGTTCCAGCCATCTCAGCAAAACCCACAGGCCAGGGCTTTGTCCAACCTCAGCAA  
CTGCCGAGTTCGAGGAAATAAGGAACCTAGCGCTACAGACGCTACCAGCAATGTGCAATGTCTACATCCCTCCATATTGCTCGAC  
CACCATTGCGCCATTGGCATCATGAGTACTAACTGA

$\alpha$ -B12 amino acid

MKTFLILALLAIVATTTTTAVRVPV .LQPQNPSQQQPQEQVPLVQQQQFLGQQQQQFPQQQPPFPQQPPYPQPQPFLPQLPYPQP  
QPPFPQQSYPPQPYPQPQQPISQQQAQLQQQQQQQQQQQQQILQQILQQQLIPCRDVVLLQPNIAHASSQVXQQSYQLL  
QQLCCQQLWQTPEQSRQAIHNVIAHAIILHQOQQOQQOQQOQQOQQOQPPSSQVSYQQPQQQYPSGGQSFQPSQQNPQAQGFVQPQQ  
LPQFEEIRNLALQTLPAMCNVYIPPYCSTTIAPFGIMSTN .

$\alpha$ -B13 nucleotide 882 bp

ATGAAGACCTTTTCTATCCTTGCCCTCCTTGCTATCGTGGCGACCACCACCACAACCTGCAGTTAGAGTTCCAGTGCACATAATTGCA  
GCCACAAAATCCATCTCAGCAACAACCACAAGAGCAAGTTCATTGGTGAACAACAACAATTTCTAGGGCAGCAACAACAACAAT  
TTCCAGGGCAACAACAACCATTTCACCACAACAGCCATATCCGAGCCGCAACCAATTTCTGCCACAACCTACCATATCCGAGCCG  
CAACCATTTCACCACAACAATCATATCCACAACCACAACCACAATATCCGCAACCACAACAACCAATTTTCGACAGCAACAAGCACA  
ACTACAACAACAACAACAACAACAACAACAACAACAACAACAACAACAACAACAATCCTTCAACAATTTCTGCAACAACAACCTGATTCCATGTAGGG  
ATGTCGTCTTGCAACAACCAACATAGCACATGCAAGCTCACAGTATCGCAACAAGTTACCACTGTTGCAACAATTATGTTGT  
CAGCAACTGTGGCAGACCCCGAGCAGTCACGGTCCAAGCCATCCACAATGTCAATCATGCTATTATTTGTCATCAACAACAACA  
ACAACAACAACAACAACAACAACAACAACAACAACAACCCTGAGCCAGGTCCTTACCAGCAGCCTCAGCAACAATATC  
CATCAGGCCAGGGCTCGTTCCAGCCATCTCAGCAAAACCCACAGGCCAGGGCTTTGTCCAACCTCAGCAACTGCCGAGTTCGAG  
GAAATAAGGAACCTAGCGCTACAGACGCTACCAGCAATGTGCAATGTCTACATCCCTCCATATTGCTCGACCACCATTGCGCCATT  
TGGCATCATGAGTACTAACTGA

$\alpha$ -B13 amino acid 294 aa

MKTFLLILALLAIVATTTTTAVRVVPLVQPPQNPSSQQQPQEQVPLVQQQQFLGQQQQQFPGQQQPFPFPQPPYPQPPFLPQLPYPQP  
QPFPPQSSYPPQPPQYPQPPQPPISQQQAQLQQQQQQQQQQQQQILQQILQQQLIPCRDVLVQQPNIAHASSQVSSQSYQLLQQLCC  
QQLWQTPEQSRCAIHNVIHAIILHQQQQQQQQQQQQQQQPPSSQVSYQQPQQQYPSGQGSFQPSQQNPQAQGFVQPQQLPQFE  
EIRNLALQTLPAMCNVYIPPYCSTTIAPFGIMSTN.

$\alpha$ -B14 nucleotide 876 bp

ATGAAGACCTTTTCTCATCCTTGCCCTCCTTGCTATCGTGGCGACCACCACCACAACCTGCAGTTAGAGTTCAGTGCCACAATTGCA  
GCCACAAAATCCATCTCAGCAACAACCAAGAGCAAGTTCCATTGGTGAACAACAACAATTTCTAGGGCAGCAACAACAACAAT  
TTCCAGGGCAACAACAACCAATTTCCACCACAACAGCCATATCCGAGCCGCAACCAATTTCTGCCACAACCTACCATATCCGAGCCG  
CAACCAATTTCCACCACAACAATCATATCCACAACCACAACCAACAATATCCGCAACCACAACAACCAATTTCCGAGCAACAAGCACA  
ACTACAACAACAACAACAACAACAACAACAACAACAACAACAACAACAACAACAACAACAACAACAACAACAACAACAACAACAACA  
ATGTCGTCTTGCAACAACCAATATAGCACATGCAAGCTCAAAAGTATCGCAACAAGTTACCAACTGTTGCAACAATTATGTTGT  
CAGCAACTGTGGCAGACCCCGAGCAGTCACGGTGCCAAGCCATCCACAATGTCAATTCATGCTATTATTTTGCATCAACAACAACA  
ACAACAACAACAACAACAACAACAACAACAACAACAACAACAACAACAACAACAACAACAACAACAACAACAACAACAACAACAACA  
GCCAGGGCTTCTTCCAGCCATCTCAGCAAAACCCACAGGCCAGGGCTTTGTCCAACCTCAGCAACTGCCGAGTTCGAGGAAATA  
AGGAACCTAGCGCTGCAGACGCTACCAGCAATGTGCAATGTCTACATCCCTCCATATTGCTCGACCACCATTGCGCCATTTGGCAT  
CATGAGTACTAACTGA

$\alpha$ -B14 amino acid 292 aa

MKTFLLILALLAIVATTTTTAVRVVPLVQPPQNPSSQQQPQEQVPLVQQQQFLGQQQQQFPGQQQPFPFPQPPYPQPPFLPQLPYPQP  
QPFPPQSSYPPQPPQYPQPPQPPISQQQAQLQQQQQQQQQQQQQILQQILQQQLIPCRDVLVQQPNIAHASSKVSQSYQLLQQLCC  
QQLWQTPEQSRCAIHNVIHAIILHQQQQQQQQQQQQQQQPPSSQVSYQQPQQQYPSGQGFQPSQQNPQAQGFVQPQQLPQFE  
EIRNLALQTLPAMCNVYIPPYCSTTIAPFGIMSTN.

$\alpha$ -B15 nucleotide 873 bp

ATGAAGACCTTTTCTCATCCTTGCCCTCCTTGCTATCATGGCGACCACCACCACAACCTGCAGTTAGAGTTCAGTGCCACAATTGCA  
GCCACAAAATCCATCTCAGCAACAACCAAGAGCAAGTTCCATTGGTGAACAACAACAATTTCTAGGGCAGCAACAACAACAAT  
TTCCAGGGCAACAACAACCAATTTCCACCACAACAGCCATATCCGAGCCGCAACCAATTTCTGCCACAACCTACCATATCCGAGCCG  
CAACCAATTTCCACCACAACAATCATATCCACAACCACAACCAACAATATCCGCAACCACAACAACCAATTTCCGAGCAACAAGCACA  
ACTACAACAACAACAACAACAACAACAACAACAACAACAACAACAACAACAACAACAACAACAACAACAACAACAACAACAACAACA  
TCTTGCAACAACCAATATAGCACATGCAAGCTCACAAGTATCGCAACAAGTTACCAACTGTTGCAACAATTATGTTGTGTCAGCAA  
CTGTGGCAGACCCCGAGCAGTCACGGTGCCAAGCCATCCACAATGTCAATTCATGCTATTATTTTGCATCAACAACAACAACAACA  
ACAACAACAACAACAACAACAACAACAACAACAACAACAACAACAACAACAACAACAACAACAACAACAACAACAACAACAACAACA  
AGGGCTTCTTCCAGCCATCTCAGCAAAACCCACAGGCCAGGGCTTTGTCCAACCTCAGCAACTGCCGAGTTCAGGAAATAAGG  
AACCTAGCGCTGCAGACGCTACCAGCAATGTGCAATGTCTACATCCCTCCATATTGCTCGACCACCATTGCGCCATTTGGCATCAT  
GAGTACTAACTGA

$\alpha$ -B15 amino acid 291 aa

MKTFLLILALLAIMATTTTTAVRVVPLVQPPQNPSSQQQPQEQVPLVQQQQFLGQQQQQFPGQQQPFPFPQPPYPQPPFLPQLPYPQP  
QPFPPQSSYPPQPPQYPQPPQPPISQQQAQLQQQQQQQQQQQQQILQQILQQQLIPCRDVLVQQPNIAHASSQVSSQSYQLLQQLCCQQ  
LWQTPEQSRCAIHNVIHAIILHQQQQQQQQQQQQQQQPPSSQVSYQQPQQQYPSGQGFQPSQQNPQAQGFVQPQQLPQFE  
EIRNLALQTLPAMCNVYIPPYCSTTIAPFGIMSTN.

$\alpha$ -B16 nucleotide 891 bp

ATGAAGACCTTTTCTCATCCTTGCCCTCCTTGCTATCGTGGCGACCACCACCACAACCTGCAGTTAGAGTTCAGTGCCACAATTGCA  
GCCACAAAATCCATCTCAGCAACAACCAAGAGCAAGTTCCATTGGTGAACAACAACAATTTCTAGGGCAGCAACAACAACAAT  
TTCCAGGGCAACAACAACCAATTTCCACCACAACAGCCATATCCGAGCCGCAACCAATTTCTGCCACAACCTACCATATCCGAGCCG  
CAACCAATTTCCACCACAACAATCATATCCACAACCACAACCAACAATATCCGCAACCACAACAACCAATTTCCGAGCAACAAGCACA  
ACTACAACAACAACAACAACAACAACAACAACAACAACAACAACAACAACAACAACAACAACAACAACAACAACAACAACAACAACA  
TCTTGCAACAACCAATATAGCACATGCAAGCTCACAAGTATCGCAACAAGTTACCAACTGTTGCAACAATTATGTTGTGTCAGCAA  
CTGTGGCAGACCCCGAGCAGTCACGGTGCCAAGCCATCCACAATGTCAATTCATGCTATTATTTTGCATCAACAACAACAACAACA  
ACAACAACAACAACAACAACAACAACAACAACAACAACAACAACAACAACAACAACAACAACAACAACAACAACAACAACAACAACA  
AACATATCCATCAGGCCAGGGCTTCTTCCAGCCATCTCAGCAAAACCCACAGGCCAGGGCTTTGTCCAACCTCAGCAACTGCCG  
CAGTTCGAGGAAATAAGGAACCTAGCGCTGCAGACGCTACCAGCAATGTGCAATGTCTACATCCCTCCATATTGCTCGACCACCAT  
TGGCCATTTGGCATCATGAGTACTAACTGA



$\alpha$ -B16 amino acid 297 aa

MKTFLILALLAIVATTTTTAVRVPVLPQLQPQNPSQQQPQEQVPLVQQQQFLGQQQQFPGQQQPFPPQPPYPQPFPFLPQLPYPQP  
QPFPPQSSYPQPQPYPQPQQPISQQQAQLLQQQQQQQQQQQILQQILQQQLIPCRDVVLQQPNIAHASSQVSSQSYQLLQQLCCQQ  
LWQTPEQRSRCQAIHNVIHAIILHQQQQQQQQQQQQQQQQQQPSQVSYQQPQQQYPSGQGFQPSQQNPQAQGFVQPQQLP  
QFEIRNLALQTLPAMCNVYIPPYCSTTIAPFGIMSTN.

$\alpha$ -B17 nucleotide 891 bp

ATGAAGACCTTTCTCATCCTTGCCCTCCTTGCTATCGTGGCGACCACCACCACAACCTGCAGTTAGAGTTCCAGTGCCACAATTGCA  
GCCACAAAATCCATCTCAGCAACAACCAAGAGCAAGTTCCATTGGTGAACAACAACAATTTCTAGGGCAGCAACAACAACAAT  
TTCCAGGGCAACAACAACCATTTCCACCACAACAGCCATATCCGCAGCCGCAACCATTTCTGCCACAACCTACCATATCCGCAGCCG  
CAACCATTTCCACCACAACAATCATATCCACAACCACAACCAATATCCGCAACCACAACAACCAATTTCCAGCAACAACAAGCACA  
ACTACTACAACAACAACAACAACAACAACAACAACAACAACAACAACAACAACAACAACAATCCTTCAACAATTTCTGCAACAACA  
ACTGATTCATGCAGGGATGTCGTCTTGCAACAACCCAATATAGCACATGCAAGCTCACAAGTATCGCAACAAGTTACCAACTGTTGCA  
AACAATTATGTTGTCAGCAACTGTGGCAGACCCCCGAGCAGTCACGGTGCCAAGCCATCCACAATGTCTCATGCTATTATTTGTCAT  
ACAACAACAACAACAACAACAACAACAACAACAACAACAACAACAACAACAACCGTCGAGCCAGGTCTCCTACCAGCAGCCTCAGC  
AACATATCCATCAGGCCAGGGCTTCTTCCAGCCATCTCAGCAAAACCCACAGGCCAGGGCTTTGTCCAACCTCAGCAACTGCCG  
CAGTTCGAGGAAATAAGGAACCTAGCGCTGCAGACGCTACCAGCAATGTGCAATGTCTACATCCCTCCATATTGCTCGACCACCAT  
TGCGCCATTTGGCATCATGAGTACTAACTGA

$\alpha$ -B17 amino acid 297 aa

MKTFLILALLAIVATTTTTAVRVPVLPQLQPQNPSQQQPQEQVPLVQQQQFLGQQQQFPGQQQPFPPQPPYPQPFPFLPQLPYPQP  
QPFPPQSSYPQPQPYPQPQQPISQQQAQLLQQQQQQQQQQQQQILQQILQQQLIPCRDVVLQQPNIAHASSQVSSQSYQLLQQL  
LCCQQLWQTPEQRSRCQAIHNVIHAIILHQQQQQQQQQQQQQQQQQQPSQVSYQQPQQQYPSGQGFQPSQQNPQAQGFVQPQQLP  
QFEIRNLALQTLPAMCNVYIPPYCSTTIAPFGIMSTN.

$\alpha$ -B18 nucleotide 885 bp

ATGAAGACCTTTCTCATCCTTGCCCTCCTTGCTATCGTGGCGACCACCACCACAACCTGCAGTTAGAGTTCCAGTGCCACAATTGCA  
GCCACAAAATCCATCTCAGCAACAACCAAGAGCAAGTTCCATTGGTGAACAACAACAATTTCTAGGGCAGCAACAACAACAAT  
TTCCAGGGCAACAACAACCATTTCCACCACAACAGCCATATCCGCAGCCGCAACCATTTCTGCCACAACCTACCATATCCGCAGCCG  
CAACCATTTCCACCACAACAATCATATCCACAACCACAACCAATATCCGCAACCACAACAACCAATTTCCAGCAACAACAAGCACA  
ACTACTACAACAACAACAACAACAACAACAACAACAACAACAACAACAACAACAACAACAACAATCCTTCAACAATTTCTGCAACA  
ACAACTGATTCATGCAGGGATGTCGTCTTGCAACAACCCAATATAGCACATGCAAGCTCACAAGTATCGCAACAAGTTACCAACTGTT  
GCAACAATTATGTTGTCAGCAACTGTGGCAGACCCCCGAGCAGTCACGGTGCCAAGCCATCCACAATGTCTCATGCTATTATTTGTC  
ATCAATCGTCATCAACAACAACAACAACAACAACAACAACAACAACAACAACAACCGTCGAGCCAGGTCTCCTACCAGCAGCCTCAG  
CAACAATATCCATCAGGCCAGGGCTTCTTCCAGCCATCTCAGCAAAACCCACAGGCCAGGGCTTTGTCCAACCTCAGCAACTGCCG  
CAGTTCGAGGAAATAAGGAACCTAGCGCTGCAGACGCTACCAGCAATGTGCAATGTCTACATCCCTCCATATTGCTCGACCACCAT  
TTGCGCCATCATGAGTACTAACTGA

$\alpha$ -B18 amino acid 295 aa

MKTFLILALLAIVATTTTTAVRVPVLPQLQPQNPSQQQPQEQVPLVQQQQFLGQQQQFPGQQQPFPPQPPYPQPFPFLPQLPYPQP  
QPFPPQSSYPQPQPYPQPQQPISQQQAQLLQQQQQQQQQQQQQILQQILQQQLIPCRDVVLQQPNIAHASSQVSSQSYQLLQQL  
LCCQQLWQTPEQRSRCQAIHNVIHAIILHHRHQQQQQQQQQQQQQPSQVSYQQPQQQYPSGQGFQPSQQNPQAQGFVQPQQLPQF  
EIRNLALQTLPAMCNVYIPPYCSTTIAPFGIMSTN.

$\alpha$ -B19 nucleotide 744 bp

ATGAAGACCTTTCTCATCCTTGCCCTCCTTGCTATCGTGGCGATGCGACCACCGCCACAACCTGCAGTTAGAGTTCCAGTGCCACAA  
TTGCGACCCACAAAATCCATCTCAGCAACAACCAAGAGCAAGTTCCATTGGTGAACAACAACAATTTCTAGGGCAGCAATAACC  
ATTTCCAGCCACAACAACCATATCCACAGCCGCAACCATTTCTCCACAACCTACCATGTCCGCAGCCGCAACCATTTCCACCACAAC  
AATCATATCCACAACCACAACCAAGTATCCGCAACCACAACAACAACAATTTCCAGCAACAACAAGCACAACAACAACAACAACA  
CAACAACAACAATCCTTCAACAATTTCAACAACAACAACAACAACAACAACAACAACAACAACAACAACAACAACAACAACAACA  
GCCAAGTCTATCCACAATGTGTTTCTATGCTATTATTTCTCCATCAACAACAACAACAACAACAACAACAACAACAACAACAACA  
CAGGTCTTCTACCAGCAGCCTCAGCAACAATATCCATCAGGCCAGGGTCTCCTTCCAGCCATCTCAGCAAAACCCACAGGCCATGG  
CTTTGTCCAACCTCAGCAACTGCCACAGTTTGGAGAAATAAGGAACCTAGCGCTACAGACACTACCAGCAATGTGCAATGTCTACA  
TCCCTCCATATTGCTCGACCACCATTTGCGCCATTTGGCATCGTACTAACTGA

$\alpha$ -B19 amino acid 298 aa

MKTFLLILALLAIVAMRPPPLQLQL...VPVPQLQPQNPSQQQPQEQVPLVQQQQFLGQQ.PFRPQQPYPQPFPFPQLPCPQPQFPF  
PQQSYPPQPQPYPQPQQTISQQQAQQQQ.QQQQILQQILQQQLIPCRDVLVQQPRAVTVPSHPQCRSCYYS...QQQQKQQQQQ  
QPSQVQFYQQPQQQYPSGQGSFQPSQQNPQAHGFVQFQQLPQFEEIRNLALQTLPAMCNVYIPPYCSTTIAPFGIVSTN.

$\alpha$ -B20 nucleotide 860 bp

ATGAAGACCTTTCTCATCCTTGCCCTCCTTGCTATCATGGCAATGCGACCACCGCCACAACCTGCAGTTAGAGTTCAGTGCCACAA  
TTGCAACCAGAAAATCCATCTCAGCAACAACCACAAGAGCAAGTTCCATTGGTGCAACAACAACAAATTTCTAGGGCAGCAACAACA  
ACAATTTCCAGGGCAGCAATAACCATTTTCGACCACAACAGCCATATCCGCAGCCGCAACCATTTCTCCACAACCTACCATGTCCGC  
AACCGCAACCATTTCCACCACAACAATCATATCCACAACCACAACCACAGTATCCGCAACCACAACAACAATTTTCGAGCAACA  
GCACAACAACAACAATGACAACCACAACAACAATCCTTCAACAATTTCAAAAAACAACCTGATCCATGCAGGGATGTCTGCTCTT  
GCAACAACCCAACATAGCACATGCAAGCTCACAAGTATCACAACAAGTTACCATCTGTTGCAACAATTATGTTGTTAGCAACTGT  
GGCAGACCCCGAGCTGTACGGTGCCAAGTCTCCACAATGTCGTTTATGCTATTATTCTCCATCAACAACAACAACAACAACA  
CAACAACAACAACAACAACAACCGTTCGAGCCAGGTTCTTAGCAGCAACCTCAGCAACAATATCCATCAGCCCAGGGCTCCTTCCA  
GCCATCTGAGCAAAACCCACAGGCCGATGGCTTTGTCCAACCTCAGCAACTGCCCGAGTTTGAGTAAATAAGGAACCTAGCGCTGC  
AGACACTACCAGCAATGTGCAATGTCTACATCCCTCCATATTGCTCGACCACCATTTGCGCCATTTGGCATCGTGAGTACTAATTGA

$\alpha$ -B20 amino acid 295 aa

MKTFLLILALLAIMAMRPPPLQLLEFQCHNC...PVPQLQPENPSQQQPQEQVPLVQQQQFLGQQQQQFPQQ.PFRPQQPYPQPQP  
FPPQLPCPQPFPFPQQSYPPQPQPYPQPQQTISQQQAQQQQ.QPQQQILQQILQKQLIPCRDVLVQQPNIAHASSQVSQQSYHLL  
QQLCC.QLWQTPELSRCQVIHNVVHAIILHQQQQQKQQQQQQQPSQV.F.PPQQQYPSAQGSFQSEQNPQADGFVQPQQLPQF  
E.IRNLALQTLPAMCNVYIPPYCSTTIAPFGIVSTN.

$\alpha$ -B21 nucleotide 834 bp

ATGAACCTTCTCCTTGCCCTCGCCCTCCTTGCTATCGTGGCGACCACCGCCACAACCTGCAGTTAGAGTTCAGTGCCACAATTGCA  
GCCACAAAATCCATCTCAGCAACAACCACAAGAGCAAGTTCTATTGGTGCAACAACAACCATTTCTAGGGCAGCAACAACAACAAT  
TTCCAGGGCAGCAATAACCATTTTCGACCACAACAGCCATATCCGCAGCCGCAACTATTTCTCCAAAACCTACCATATCCGCAGCCG  
CAACCATTTACACCACATCAATCATATCCACAACCACAACCACAGTATCCGCAACCACAACAAGCAATTTTCGAGCAACAAGGACA  
ACAACAACAACAACAACAATCCTTCAACAATTTGCAACAACAACCTGATTCATGCAGGGATGTCTGTTGCAACAACCCCAACA  
TAGCACATGCAAGCTACAAGTATCTCAACAAGTTACCATCTATTGCAACAATTATGTTGTCAGCAACTGTGGCAGACCCCGAG  
CTGTACAGTGCCAAGTCAATCCACAATGTCGTTTATGCTATTATTCTGCATCATCAATAACAACAACAACAACAACAACAACCGTC  
GAGCCAGGTTCTTACCAGCAGCCTCAGCAACAATATCCATCAGGCCACGGCTCCTTCCAGCCATCTCAGCAAAACCCACAGACCC  
AGGGCTTTGTCCAACCTCAGCAACTGCTGCAGTTTGAGGAAATAAGGAACGTAGCGCTGCAGACACTACCAGCAATGTGCAATGT  
TACATCCCTCCATATTGCTCGACCACCATTTGCGCCATTTGGCATCGTGAGTACTAACTGA

$\alpha$ -B21 amino acid 278 aa

MNLLLALALLAIVATTATTAVRVPVPLQPLQNPSQQQPQEQVLLVQQQPFLGQQQQQFPQQ.PFRPQQPYPQPQLFPPKLPYPQP  
QPFTPHQSYPPQPQPYPQPQQAISQQQGQQQQQQILQQILQQQLIPCRDVLVQQPNIAHASSQVSQQSYHLLQQLCCQQLWQTPE  
LSQCQVIHNVVHAIILHHQ.QQQQQQPSQVQFYQQPQQQYPSGHGSFQPSQQNPQTQGFVQPQQLLQFEEIRNVALQTLPAMCNV  
YIPPYCSTTIAPFGIVSTN.

$\alpha$ -B22 nucleotide 2087 bp

ATGAAGACCTTTCTCATCCTTGCCCTCCTTGCTATCGCGGTGACCACCGCCACTACTGCAGTGAGAGTTCAGTGCCATAATTGCA  
GCCACAAAATCCATCTCAGCAACAACCACAAGAGCAAGTTCCATTGGTGCAACAACAACAATTTCTAGGGCAGCAACAACAACACT  
TTCCAGGGCAGCAACAACCATTTCCACCACAACAGCCATATCCGCAGCCGCAACCATTTCCACCACAACCTACCATATCTGCAGCCG  
CAACCATTTCCACCACAACAATCATATCCACAACCACAACCACAGTATCCGCAATCACAACAACAACAATTTCCAGCAACAACA  
ACAACAACAACAACAACAACAACAACAACAACAACAACAACAACAACAACAATCCTTCAACAATTTGCAACAACAATTGATTCATGCA  
GGGATGTCTTTGCAACAACCCAACATAGCACATGCAAGCTCACAAGTATCGCAACAAGTTACCAACTTTTTCGCAACAATTATGT  
TGTGCAACTGTGGCAGACCCCTGAGCAGTACGGTGCCAAGCCATCCACAATGTCGTTTATGCTATTATTCTGCATCATCATCA  
TCATCATCAACAACAACAACAACAACAACAACAACAACAACAACAACAACAACAACAACAACAACAACAACAACAACAACAACA  
AACACAACAGCAACAACAACAACAGCAACAACAACAGCAGCAACAACAACAGCAGCAACAACAACAGCAGCAACAACAACAGCAA  
CAACAACAGCAACAACAACAGCAACAACAACAGCAACAACAACAGCAGCAACAACAACAGCAGCAGCAACAACAACAGCAGCAACAACA  
GCAGCAACAACAACAACAACAACAACAACAACAACAACAACAACAACAACAACAACAACAACAACAACAACAACAACAACAACAACA  
AACACAACAACAACAACAACAACAACAACAACAACAACAACAACAACAACAACAACAACAACAACAACAACAACAACAACAACAACA  
CAACAACAACAACAACAACAACAACAACAACAACAACAACAACAACAACAACAACAACAACAACAACAACAACAACAACAACAACA  
ACAACAACAACAACGACACAACAACAACGACAACAACAACGACAACAACAACGACCACAACAACAACAACGACAACAACAACGACAACA



TGCAACAACACAACATAGCGCATGCAAGCTCACAAGTTTTGCAACAAAGTACTTACCAGTTGTTGCAACAATTGTGTTGTCAGCAG  
CTGTGGCAGATCCCCGAGCAGTCGCGGTGCCAAGCCATCCAGAATGTTGTTTCATGCTATTATTCTGCATCAACAACAACAACGACA  
ACAACAACAACAACAACAACAACAACAACAACAACAACAACAACAACAACAACAACAACAACAACAACAACAACAACAACAACAACAGC  
AGCAACAACCGTCGAGCCAGGTCTCCTTCCAACAGCCTCAGCAACAATATCCATCAGGCCAGGGCTCCTTCCAGCCATCTCAGCAA  
AACCACAGGCCAGAGCTCTGTCCAACATCAACAACCTACCCCAATTTGAGGAAATAAGGAACCTAGCACTGCAGACGCTACCAGC  
AGTGTGCAATGTCTACATCCCTCCATATTGCTCGACCACCATTGCGCCATTTGGCATCTTCGGTACTAACTGA

$\alpha$ -B25 amino acid 311 aa

MKTFILALLAIVATTATTAVTVVPVQLQPQNPSQQQPQKQVPLVQQQQFLGQQQPFPPQQPYQPQPFPSQQPYQPQPFPLPQLP  
YPRPQFPLPQQPYQPPEPQYPPQPPISQQQQQQQQQQQILQQILQQQLIPCRDVILQQHNIHASSQVLLQSSYQLLQQLCCQQ  
LWQIPEQSRQAIQNVVHAIILHQQQQRQQQQQQQQQQQQQQQQQQQQQQQQQQQQQQQQQQPSSQVSVFQQPQQQYPSGQGSFQPSQQ  
NPQAQSSVQHQLPQFEEIRNLALQTLPAVCNVYIPPYCSTTIAPFGIFGTN.

$\alpha$ -B26 nucleotide 852 bp

ATGAAGACCTTTCTCATCCTTGCCCTCCTTGCTATCGCGGCGACCACCGCCACAACCTGCAGTTAGAGTTCCAGTGCCACAATTGTA  
GCCGCAAAATCCATCTCAACAACGACCACAATAGTAATTTCCGTTGGTGCAACAACAACAATTTCCAGGGCAGCAACAACCATTTCC  
CACCACAACAGCCATATCCGAGCCGCAACCGTTTCTGTCAACAACAACCATATTCGCAACCGTAACCATTTCCGCCACAACCTACCA  
TATCCACAAGCGCAACATTTCCAACAACAACAACATATCCACAACCGCAACCCAGTATCCGCAACCACAACAACAATTTCCGCA  
GCAGCAGCAGCAGCAACAACAACAACAACAACAACAACAACAACAACAATCCTTCAACAATTTGCAACAACAATGATTCCATGCA  
GGGATGTCGTCTTGCAACAACAACATTGCATATGCAAGCTCACAAGTATTGCAACAAGTAGTTACCAACTGTTGCAACAATTA  
TGTTGTCAGCAGCTGTGGCAGATCCCGAGCAGTCGCGGCGCCAAGCCATCCACAGTGTCTGTTTCATGCTATTATTTCCATCATCA  
TCAACAACAACAACCGTCGAGCCAGGTCTCCTACCAGCAGCCTCAACAACAATATCCATCAAGCCAGGGCTCCTTCTAGCCATCTC  
AGCTAAACCCACAGGCCAGGGCTCTGTCCAGCCTCAACAACCTGCCCCGGTTCAAGGAAATAAGTAACCTAGCGCTGCAGATGCTG  
CCAGCAATGTGCAATGTCTACATCCCTCCATATTGCTTGAGCACCATTGTGCCATTTGGCATCTTCGGTACTAACTAA

$\alpha$ -B26 amino acid 284 aa

MKTFILALLAIAATTTATTAVRVPVQL.PQNPSQQRPQ..FPLVQQQQFPGQQQPFPPQQPYQPQPFLSQQPYSP.PFPPQLP  
YPQAQPFPTQQPYQPQYPPQPPISQQQQQQQQQQQQQQQILQQILQQQMIPCRDVVLQQHNIAYASSQVLLQSSYQLLQQL  
CCQQLWQIPEQSRRAIHSVVHAIIFHHHQQQPSSQVSVYQQPQQQYPSQGSF.PSQLNPQAQGSVQPQLPRFKEISNLALQML  
PAMCNVYIPPYCLSTIVPFIFGTN.

$\alpha$ -D1 nucleotide 864 bp

ATGAAGACtTTTCTCATCCTTGCCCTCCTTGCTATtGTGGCGACCACTGCCACAACCTGCAGTTAGAGTTCCAGTGCCACAATTGCA  
GCCGCAAAATCCATCTCAGCAACAACCACAAGAGCAAGTTCCATTGGTGCAACAACAACAATTTCCAGGGCAGCAACAACCATTTCC  
CACCACAACAGCCATATCCGAGCCGCAACCATTTCCATCACAACAACCATATCCGAGCCGCAACCATTTCCGTCACAACCTACCA  
TATCCGAGCCGCAACCATTTCCACCACAACAACCTATCCACAACCGCAACCCACAATATCCGCAACCACAACAACCAATTTCCGCA  
GCAACAAGCACAACAACAACAACAACAACAACAACAACAACAATCCTTCAACAATTTGCAACAACAACCTGATTCCATGCAGGGATG  
TCGTCTTGCAACAACAACATAGCGCATGCAAGCTCACAAGTATTGCAACAAGTAGTTACCAACTGTTGCAACAATTTATGTTGT  
CAGCAGCTGTGGCAGATCCCCGAGCAGTCGCGGTGCCAAGCCATCCACAATGTCGTTCATGCTATTATTCTGCATCAACAACAACA  
ACAACAACAACAACAACAACAACAACCATCGAGCCAGGTTTCTTACCAGCAGCCTCAGCAACAATATCTATCAGGCCAGGGCTCCT  
TCCAGCCATCTCAGCAAAACCCACAGGCCAGGGCTCTGTCCAGCCTCAACAACCTGCCCCAGTTCCGAGGAAATAAGGAACCTAGCG  
CTACAGAGCTACCAGCAACCTGCAATGTCTACATCCCTCCATATTGCTCGACCACCATTGCGCCATTTGGCATCTTCGGTACTAA  
CTGA

$\alpha$ -D1 amino acid 288 aa

MKTFILALLAIVATTATTAVRVPVQLQPQNPSQQQPQEQVPLVQQQQFPGQQQPFPPQQPYQPQPFPSQQPYQPQPFPSQLP  
YPQPQPFPPQQPYQPQYPPQPPISQQQAQQQQQQQQQILQQILQQQLIPCRDVVLQQHNIHASSQVLLQSSYQLLQQLCC  
QQLWQIPEQSRQAIHNVVHAIILHQQQQQQQQQQQPSSQVSVYQQPQQQYLSGQGSFQPSQQNPQAQGSVQPQLPQFEEIRNLAL  
LQTLPATCNVYIPPYCSTTIAPFGIFGTN.

$\alpha$ -D2 nucleotide 251 bp

AACAACAACAACAACAACAACCGTTGAGCCAGGTCTCCTTCCAGCAGCCTCAGCAACAATATCCATCAGGCCAGGGCTCCTTCCAG  
CCATCTCAGCAAAACCCACAGGCCAGGGCTCTTTCCAGCCTCAACAACCTGCCAGTTTGGAGAAATAAGGAACCTAGCGCTACA  
GACGCTACTTGCAATGTGCGATGTCTATATCCCTCCATATTGCACCATTGCTCCATTTGGCATCTTTGGTACTAACTGA

$\alpha$ -D2 amino acid 83 aa

QQQQQPLSQVVSFQQPQQYPSGQGSFQPSQQNPQAQGSFQPQQLPQFEEIRNLALQTLAMCDVYIPPYCTIAPFGIFGTN.

$\alpha$ -D4 nucleotide 876 bp

ATGAAGACCTTTCTCATCCTTGCCCTCCTTGCTATTGTGGCGACCACCGCCACAACCTGCAGTTAGAGTTCCAGTGCCACAATTGCA  
GCTACAAAATCCATCTCAGCAACAGCCACAAGAGCAAGTTCCATTGGTACAAGAACAACAATTTCCAGGGCAGCAACAACCATTTTC  
CACCACAACAGCCATATCCGCAGCCGCAACCATTTCCATCACAACAACCATATCTGCAGCTGCAACCATTTCCACAGCCGCAACTA  
CCATATCCGCAGCCGCAACCATTTGACCACAACAACCATATCCACAGCCGCAACCACAGTATTGCAACCACAACAACCAATTTTC  
GCAGCAGCAGCAGCAGCAGCAACAACAACAACAACAACAATCCTACAACAATTTTGCAACAACAACCTGATTCCATGCA  
GGGATGTTGTATTGCAACAACAACAATAGCGCATGGAAGCTCACAAGTTTTGCAAGAAAGTACTTACCAGCTGGTGAACAATG  
TGTTGTCAGCAGCTGTGGCAGATCCCCGAGCAGTCGCGGTGCCAAGCCATCCACAATGTTGTTTCATGCTATTATTTGTCATCAACA  
ACACCACCACCACAACAACAACAACAACAACAACAACCGTTGAGCCAAGTCTCCTTCCAACAGCCTCAGCAACAATATC  
CATCAGGCCAGGGCTTCTTCCAACCATCTCAGCAAAACCCACAGGCCAGGGCTCTTTCCAGCCTCAACAACCTGCCAGTTTGGAG  
GCAATAAGGAACCTAGCGCTACAGACGCTACCTGCAATGTGCAATGTGTATATCCCTCCATATTGCACCATTGCTCCATTTGGCAT  
CTTCGGTACTAACTGA

$\alpha$ -D4 amino acid 292 aa

MKTFILILALLAIVATTATTAVRVPVPLQLQLQNPSSQQPQEQVPLVQEQFPQQQFPFPQQPYPQPQFPFSSQPYLQLQFPFPQPL  
PYPQPQFPFPQQPYPQPQYSQPQPISQQQQQQQQQQQQQQLLQQLLQQLLIPCRDVLVQQHNIAGSSQVLQESTYQLVQQ  
CCQLWQIPEQSRQAIHNVVHAIILHQHHHHQQQQQQQQQPLSQVVSFQQPQQYPSGQGFQPSQQNPQAQGSFQPQQLPQFE  
AIRNLALQTLAMCDVYIPPYCTIAPFGIFGTN.

$\alpha$ -D5 nucleotide 927 bp

ATGAAGACCTTTCTCATCCTTGCCCTCCTTGCTATTGTAGCAACCACCGCCACAATTCAGTTAGAGTTCCAGTGCCACAATTGCA  
GCCACAAAATCCATCTCAGCAACAACCACAAGAGCAAGTTCCATTGGTACAACAACAACAATTTCCAGGGCAGCAACAACCATTTTC  
CACCACAACAGCCATATCCGCAGCCGCAACCATTTCCATCACAACAACCATATCTGCAGCTGCAACCATTTCCGCAGCCGCAACTA  
CCATATCCGCAGCCGCAACTACCATATCCGCAGCCGCAACTACCATATCCGCAGCCGCAACCATTTGACCACAACAACCATATCC  
ACAATCGCAACCACAGTATTGCAACCACAACAACAATTTGCGCAGCAGCAGCAACAACAACAACAACAACAACAACAACAACA  
AACACAACAACAACAACAGATCCTTCAACAATTTTGCAACAACAACCTGATTCCATGCAGGGATGTTGTATTGCAACAACACAGC  
ATAGCGTATGGAAGCTCACAAGTTTTGCAACAAGTACTTACCAGCTGGTGAACAATTTGTGTTGTCAGCAGCTGTGGCAGATCCC  
CGAGCAGTCGCGGTGCCAAGCCATCCACAATGTTGTTTCATGCTATTATTCTGCATCAACAGCAACAACAACAACAACAACAACA  
AAAAACAACCATTTGAGCCAGGTCTCCTTCCAACAGCCTCAACAACAATATCCATCAGGCCAGGGCTCCTTCCAGCCATCTCAGCAA  
AACCCACAGGCCAGGGCTCTGTCCAGCCTCAACAACCTGCCAGTTTGGAGAAATAAGGAACCTAGCGCTAGAGACGCTACCTGC  
AATGTGCAATGTCTATATCCCTCCATATTGCACCATTGCTCCAGTTGGCATCTTCGGTACTAACTGA

$\alpha$ -D5 amino acid 309 aa

MKTFILILALLAIVATTATIIVRVPVPLQPLQNPSSQQPQEQVPLVQQQQFPQQQFPFPQQPYPQPQFPFSSQPYLQLQFPFPQPL  
PYPQPQLPYPQPQLPYPQPQFPFPQQPYPQSQPQYSQPQPISQQQQQQQQQQQKQQQQQQQQQLLQQLLQQLLIPCRDVLVQQHS  
IAYGSSQVLQQSTYQLVQQQLCCQLWQIPEQSRQAIHNVVHAIILHQHHHHQQQQQQQKQPLSQVVSFQQPQQYPSGQGSFQPSQQ  
NPQAQGSVQPQQLPQFEEIRNLALQTLAMCDVYIPPYCTIAPVGFIFGTN.

$\alpha$ -D6 nucleotide 885 bp

ATGAAGACCTTTCTCATCCTTGCCCTCCTTGCTATTGTAGCAACCACCGCCACAATTCAGTTAGAGTTCCAGTGCCACAATTGCA  
GCCACAAAATCCATCTCAGCAACAACCACAAGAGCAAGTTCCATTGGTACAACAACAACAATTTCCAGGGCAGCAACAACCATTTTC

CACCACAACAGCCATATCCGCAGCTGCAACCATTTCCATCACAACAACCATATATGCAGCTGCAACCATTTCCGCAGCCGCAACTA  
CCATATCCGCAGCCGCAACTACCATATCCGCAGCCGCAACCATTTGCACCACAACAATCATATCCACAACCCGCAACCACAGTATTC  
GCAACCACAACAACCAATTTTCGCAGCAGCAGCAGCAGCAGCAGCAGCAACAACAACAACAGATCCTTCAACAAATTTTGCAACAAC  
AACTGATTCCATGCAGGGATGTTGTATTGCAACAACACAGCATAGCGCATGGAAGCTCACAAGTTTTGCAACAAAGTACTTACCAG  
CTGGTGCAACAATTTGTGTTGTCAGCAGCTGTGGCAGATCCCCGAGCAGTCGCGGTGCCAAGCCATCCACAATGTTGTTTCATGCTAT  
TATTTGTCATCAACAACAACAACAACAACAACAACAACAACAACAACCGTTGAGCCAGGTCTGCTTCCAACAGTCTCAAC  
AACAATATCCATCAGCCAGGGCTCCTTCCAGCCATCTCAGCAAAACCCACAGGCCAGGGCTCTGTCCAGCCTCAACAACCTGCC  
CAGTTTGAGGAAATAAGGAACCTAGCGCTAGAGACGCTACCTGCAATGTGCAATGTCTATATCCCTCCATATTGCACCATTGCTCC  
AGTTGGCATCTTCGGTACTAAGTGA

$\alpha$ -D6 amino acid 295 aa

MKTFLLILALLAIIVATTATIAVRVVPVQLQPQNPSQQQPQEQVPLVQQQQFPGQQQPFPPQPPYPQLQPFPSQQPYMQLQPFPPQPL  
PYPQPQLPYPQPPFRPQQSYPQPQYSQPQQPISQQQQQQQQQQQQQILQQILQQQLIPCRDVVLQQHSIAHGSSQVLLQSTYQ  
LVQQLCCQQLWQIPEQSRCAIHNVVHAILLHQQQQQQQQQQPLSQVCFQQSQQQYPSGQGSFQPSQQNPQAQGSVQPQQLP  
QFEEIRNLALETLPAMCNVYIPPYCTIAPVGIPTN.

$\alpha$ -D7 nucleotide 852 bp

ATGAAGACCTTTTCTCATCCTTGGCCCTCCTTGCTATTGTAGCAACCACCGCCACAATTCAGTTAGAGTTCCAGTGCCACAATTGCA  
GCCACAAAATCCATCTCAGCAACAACCAAGAGCAAGTTCCATTGGTACAACAACAGCAATTTCCAGGGCAGCAACAACCATTTT  
CACCACAACAGCCATATCCGCAGCCGCAACCATTTCCATCACAACAACCATATCTGCAGCTGCAACCATTTCCGCAGCCGCAACTA  
CCATATCCGCAGCCGCAACCATTTTCGACCACAACAACCATATCCACAACCGCAACCACAGTATTCGCAACCACAACAACCAATTT  
ACAGCAGCAGCAGCAGCAGCAACAACAACAACAACAACAACAGATCCTTCAACAAATTTTGCAACAATAACTGATTCCATGCA  
GGGATGTTGTATTGCAACAACACAGCATAGCGCATGGAAGCTCACAAGTTTTGCAACAAAGTACTTACCAGCTGGTGCAACAATTG  
TGTGTCACAGCTGTGGCAGATCCCCGAGCAGTCGCGGTGCCAAGCCATCCACAATGTTGTTTCATGCTATTATTTTCATGCTCAACA  
ACAACAACAACAACAACAACCGTTGAGCCAGGTCTGCTTCCAACAGCCTCAACAACAATATCCATCAGGCCAGGGCTCCTTCCAGC  
CATCTTAGCAAAACCCACAGGCCAGGGCTCTGTCCAGCCTCAACAACCTGCCCCAGTTTGAGGAAATAAGGAACCTAGCGCTAGAG  
ACGCTACCTGCAATGTGCAATGTCTATATCCCTCCATATTGCACCATTGCTCCAGTTGGCATCTTCGGTACTAAGTGA

$\alpha$ -D7 amino acid 284 aa

MKTFLLILALLAIIVATTATIAVRVVPVQLQPQNPSQQQPQEQVPLVQQQQFPGQQQPFPPQPPYPQPQPFPSQQPYLQQLPFPQPL  
PYPQPQPFPPQPPYPQPPQYSQPQQPISQQQQQQQQQQQQQILQQILQQ . LIPCRDVVLQQHSIAHGSSQVLLQSTYQLVQQL  
CCQQLWQIPEQSRCAIHNVVHAILLHQQQQQQQQPLSQVCFQQPQQYPSGQGSFQPS . QNPQAQGSVQPQQLPQFEEIRNLALE  
TLPAMCNVYIPPYCTIAPVGIPTN.

$\alpha$ -D8 nucleotide 879 bp

ATGAAGACCTTTTCTCATCCTTGGCCCTCCTTGCTATTGTAGCAACCACCGCCACAATTCAGTTAGAGTTCCAGTGCCACAATTGCA  
GCCACAAAATCCATCTCAGCAACAACCAAGAGCAAGTTCCATTGGTACAACAACAACAATTTCCAGGGCAGCAACAACCATTTT  
CACCACAACAGCCATATCCGCAGCCGCAACCATTTCCATCACAACAACCATATCTGCAGCTGCAACCATTTCCGCAGCCGCAACTA  
CCATATCCGCAGCCGCAACTACCATATCCGCAGCCGCAACCATTTTCGACCACAACAACCATATCCACAACCGCAACCACAGTATTC  
GCAACCACAACAACCAATTTTCGCAGCAGCAGCAGCAGCAACAACAACAACAACAACAACAGATCCTTCAACAAATTTTGCAAC  
AACAACCTGATTCCATGCAGGGATGTTGTATTGCAACAACACAGCATAGCGCATGGAAGCTCACAAGTTTTGCAACAAAGTACTTAC  
CAGCTGGTGCAACAATTTGTGTTGTCAGCAGCTGTGGCAGATCCCCGAGCAGTCGCGGTGCCAAGCCATCCACAATGTTGTTTCATGC  
TATTATTTCTGCATCAACAACAACAACAACAACAACAACAACAACAACCGTTGAGCCAGGTCTGCTTCCAACAGCCTCAACAACAAT  
ATCCATCAGGCCAGGGCTCCTTCCAGCCATCTCAGCAAAACCCACAGGCCAGGGCTCTGTCCAGCCTCAACAACCTGCCCCAGTTT  
GAGGAAATAAGGAACCTAGCGCTAGAGACGCTACCTGCAATGTGCAATGTCTATATCCCTCCATATTGCACCATTGCTCCAGTTGG  
CATCTTCGGTACTAAGTGA

$\alpha$ -D8 amino acid 293 aa

MKTFLLILALLAIIVATTATIAVRVVPVQLQPQNPSQQQPQEQVPLVQQQQFPGQQQPFPPQPPYPQPQPFPSQQPYLQQLPFPQPL  
PYPQPQLPYPQPPFRPQQPYPQPQYSQPQQPISQQQQQQQQQQQQQILQQILQQQLIPCRDVVLQQHSIAHGSSQVLLQSTYQ

QLVQQLCCQQLWQIPEQSRQAIHNVVHAIILHQQQQQQQQQPLSQVCFQQPQQYPSGQGSFQPSQQNPQAQGSVQPQQLPQF  
EEIRNLALETLPAMCNVYIPPYCTIAPVGIFGTN.

$\alpha$ -D9 nucleotide 861 bp

ATGAAGACCTTTCTCATCCTTGCCCTCCTTGCTATTGTAGCAACCACCGCCACAATTGCAGTTAGAGTTCCAGTGCCACAATTGCA  
GCCACAAAATCCATCTCAGCAACAACCAAGAGCAAGTTCCATTGGTACAACAACAGCAATTTCCAGGGCAGCAACAACCATTTCC  
CACCACAACAACCATATCCGCGAGCCGCAACCATTTCATCACAACAACCATATCTGCAGCTGCAACCATTTCACAGCCGCAACTA  
CCATATCCGCGAGCCGCAACTACCATATCCGCGAGCCGCAACCATTTCGACCACAACAACCATATCCACAACCGCAACCACAGTATTC  
GCAACCACAACAACCAATTTGCGAGCAGCAACAACAACAACAACAACAATCCTTCAACAATTTTGCAACAACAACACTGATTCCAT  
GCAGGGATGTTGTATTGCAACAACAACATAGCGCATGGAAGGTACAAGTTTTGCAACAAGTACTTACCAGCTGGTGCAACAA  
TTGTGTTGTGTCAGCAGCTGTGGCAGATCCCCGAGCAGTCGCGGTGCCAAGCCATCCACAATGTTGTTCATGCTATATTCTGCATCA  
TCATCAACAACAACAACAACAACAACCGTTGACCCAGGTCTCCTTCCAACAGCCTCAACAACAATATCCATCAGGCCAGGGCT  
CCTTCCAGCCATCTCAGCAAAAACCCACAGGCCAGGGCTCTGTCCAGCCTCAACAACCTGCCCCAGTTTGAGGAAATAAGGAACCTA  
GCGCTAGAGACGCTACCTGCAATGTGCAATGTCTATATCCCTCCATATTGCACCATTGCTCAAGTTGGCATTCTCGGTACTAACTG  
A

$\alpha$ -D9 amino acid 287 aa

MKTFLILALLAIVATTATI AVRVPV PQLQPQNPSQQQPQEQVPLVQQQQFPGQQQPFPPQQPYPQPQPFPSQQPYLQQLQFPQPQL  
PYPQPQLPYPQPQPFPPQQPYPQPQPQYSQPQQPISQQQQQQQQQILQQILQQQLIPCRDVVLQQHNI AHGRSQVLQQSTYQLVQQ  
LCCQQLWQIPEQSRQAIHNVVHAIILHHHQQQQQQQPLTQVSFQQPQQYPSGQGSFQPSQQNPQAQGSVQPQQLPQFEEIRNL  
ALETLPAMCNVYIPPYCTIAQVGIFGTN.

$\alpha$ -D10 nucleotide 870 bp

ATGAAGACCTTTCTCATCCTTGCCCTCCTTGCTATTGTAGCAACCACCGCCACAATTGCAGTTAGAGTTCCAGTGCCACAATTGCA  
GCCACAAAATCCATCTCAGCAACAACCAAGAGCAAGTTCCATTGGTACAACAACAACAATTTCCAGGGCAGCAACAACCATTTCC  
CACCACAACAGCCATATCCGCGAGCTGCAACCATTTCATCACAACAACCATATATGCAGCTGCAACCATTTCGCGAGCCGCAACTA  
CCATATCCGCGAGCCGCAACTACCATATCCGCGAGCCGCAACCATTTCGACCACAACAACCATATCCACAACCGCAACCACAGTATTC  
GCAACCACAACAACCAATTTGCGAGCAGCAGCAACAACAACAACAACAACAACAACAACAACAACAACAATCCTTCAACAATTTTGC  
AACAAACTGATTCCATGCAGGGATGTTGTATTGCAACAACAACAACAACAACAACAACAACAACAACAACAACAACAACAACAACA  
TACCAGCTGGTGCAACAATTTGTGTTGTCAGCAGCTGCGGTAGATCCCCAAGCAGTCGCGGTGCCAAGCCATCCACAATGTTGTTCA  
TGCTATTATTCTGCATCAACAACAACAACAACAACAACCGTTGAGCCAGGTCTCCTTCCAACAGCCTCAACAACAATATCCATCAG  
GCCAGGGCTCCTTCCAGCCATCTCAGCAAAAACCCACAGGCCAGGGCTCTGTCCAGCCTCAACAACCTGCCCCAGTTTGAGGAAATA  
AGGAACCTAGCGCTAGAGACGCTACCTGCAATGTGCAATGTCTATATCCCTCCATATTGCACCATTGCTCAAGTTGGCATTCTTGG  
TACTAACTGA

$\alpha$ -D10 amino acid 290 aa

MKTFLILALLAIVATTATI AVRVPV PQLQPQNPSQQQPQEQVPLVQQQQFPGQQQPFPPQQPYPQLQPFPSQQPYMQLQFPQPQL  
PYPQPQLPYPQPQPFPPQQSYPQPQPQYSQPQQPISQQQQQQQQQQQQQILQQILQQQLIPCRDVVLQQHNI AHGSSQVLQQST  
YQLVQQLCCQQLR. IPKQSRQAIHNVVHAIILHQQQQQQQPLSQVFSFQQPQQYPSGQGSFQPSQQNPQAQGSVQPQQLPQFEEI  
RNLALETLPAMCNVYIPPYCTIAQVGIFGTN.

$\alpha$ -D11 nucleotide 1146 bp

ATGAAGACCTTTCTCATCCTTGCCCTCCTTGCTATTGTAGCAACCACCGCCACAATTGCAGTTAGAGTTCCAGTGCCACAATTGCA  
GCCACAAAATCCATCTCAGCAACAGCCACAAGAGCAAGTTCCATTGGTACAACAACAACAATTTCCAGGGCAGCAACAACCATTTCC  
CACCACAACAGCCATATCCGCGGCGCAACCATTTCATCACAACAACCATATCTGCAGCTGCAACCATTTCGCGAGCCGCAACTA  
CCATATCCGCGAGCCGCAACCATTTCGACCACAACAACCATATCCACAACCGCAACCACAGTATTAGCAACCACAACAACCAATTTCC  
GCAGCTGCAGCAGCAACAACAACAATAGCAACAACAACAGCAACAAAACAGCAGCAACAACAACAGCAGCAGCAACAACAAC  
AACACAGCAACAACACAGCAACAACAGCACCACAGCAGTAGCAGCAGCAGCAACAACAACAACAACAACAACAACAACAACAACA  
CAGCAGCAGCAGCAGCAGCAGCAGCAGCAACAACAACAACAACAACAACAACAACAACAACAACAACAACAACAACAACAACA  
GCAGCAGCAGCAGCAGCAGCAGCAACAACAACAACAACAACAACAACAACAACAACAACAACAACAACAACAACAACAACAACA  
AACAAACAACAACAACAATTTTGCAACAACAACAACAACAACAACAACAACAACAACAACAACAACAACAACAACAACAACAACA  
TCACAAGTTTTGCAACAAGTACTTACCAGCTGGTGTAACAATTTGTGTTGTGTCAGCAGCTGTGGCAGATTCCCGAGCAGTCGCGGTG

CCAAGCCATCCACAATGTTGTTTCATGCTATTATTCTGCATCAACAACAACAACAACCGTCGAGCCAGGTCTCCTTCCAACAGCCTC  
AACAACAATATCCATCAGGCCAAGGCTCCTTCCAGCCATCTCTGCAAAACCCACAGGCCCATGGCTCTGTCCAGCCTCAACAAC TG  
CCCCAGTTTGAGGAAATAAGGAACCTAGCGCTACAGACGCTACCTGCAATGTGCAATGTCTACATCCCTCCATATTGCACCATTGC  
TCCATTTGGCATCTTCGGTACTA ACTGA

$\alpha$ -D11 amino acid 382 aa

MKTFLLALLAIIVATTATI AVRVPVPLQLPQNPSQQQPQEQVPLVQQQQFPGQQQFPPQPPYPRPQPFSSQQPYLQLQFPFPQPL  
PYPQPQPFPRPQQPYQPQPQY. QPQPISQLQQQQQQ. QQQQQKQQQQQQQQQQQQQQHQQQQHQQ. QQQQQQQQQQQQ  
QQQQQQQQQQQQQQQQQQHNNNKQQQQQQQQQQQQ. QQILQQQQQILQQQQQILQQQLIPCRDVVLQQHNI AHGS  
SQVLQQSTYQLV. QLCCQLWQIPEQSRCQAIHNVVHAIILHQQQQPSSQVVSFQQPQQQYPSGQGSFQPSLQNPQA HGSVQPQQL  
PQFEEIRNLALQTL PAMCNVYIPPYCTIAPFGIFGTN.

$\alpha$ -D12 nucleotide 849 bp

ATGAAGACCTTTCTCATCCTAGCCCTCCTTGCTATCGTGGCGACCACCGCCACAAGTGCAGTTAGAGTTCCAGTGC CACAATTGCA  
GCCGAAAATCCATCTCAACAACAACCACAAGAGCAAGTTCCATTGATGCAACAACAACAATTTCCAGGGCAGCAAGAACAAT  
TTCCACCACAACAGCCATATCCGCATCAGCAACCATTTCCATCACAACAACCATATCCGCAGCCGCAACCATTTCCGCCACA ACTA  
CCATATCCGCAGACGCAACCATTTCCACCACAACAACCATATCCACAACCGCAACCACAGTATCCGCAACCACAACAACCAATTTTC  
GCAGCAACAAGCACAACAACAACAACAACAACAATCCTTCAACAATTTCTGCAACAACAAC T GATTCCATGCAGGGATGTTG  
TCTTGCAACAACAACATAGCGCATGCAAGCTCACAAGTATTGCAACAAGTAGTTACCAACAGTTGCAACAATTATGTTGT CAG  
CAACTGTTTCAGATCCCCGAGCAGTCGCGGTGCCAAGCCATCCACAATGTGCTTCATGCTATTATTCTGCATCATCATCAACAACA  
ACAACAACAACCGTCGAGCCAGGTCCTACCAGCAGCCTCAGGAACAATATCCATCAGGCCAGGGCTCCTTCCAGTCATCTCAGC  
AAAACCCACAGGCCAGGGCTCTGTCCAGCCTCAACAAC T GCCCAGTTCCAGGAAATAAGGAACCTAGCGCTGCAGACGCTGCCA  
GCAATGTGCAATGTCTACATCCCTCCATATTGCTCGACCACCATTTGCCCATTTGGCATCTTCGGTACTA ACTGA

$\alpha$ -D12 amino acid 283 aa

MKTFLLALLAIIVATTATS AVRVPVPLQLPQNPSQQQPQEQVPLMQQQQFPGQQEQFPPQPPYPHQQPFPSQQPYQPQPFPFPQL  
PYPQTQPFPPQPPYQPQPQYQPQPISQQQAQQQQQQQILQQILQQQLIPCRDVVLQQHNI AHASSQVLQQSSYQQLQLCCQ  
QLFQIPEQSRCQAIHNVVHAIILHHHQQQQQPSSQVSYQQPQEQYPSGQGSFQSSQNPQAQGSVQPQQLPQFQ EIRNLALQTL P  
AMCNVYIPPYCSTTIAPFGIFGTN.

Note: --- represents deletion in the sequence that had resulted in frameshift mutation. In the sequences presented here, the frameshift has been manually corrected to provide a putative sequence without the deletion.

. in the middle of the sequences represents premature stop codon caused by nucleotide substitution.



**A**

```

α-D5 1 ATGAAGACCTTTCTCATCTTGCCCTCCTTGCTATTGTAGCAACCACCGCCACAATTGCA 60
α-D5 1 ATGAAGACCTTTCTCATCTTGCCCTCCTTGCTATTGTAGCAACCACCGCCACAATTGCA 60
α-D5 61 GTTAGAGTTCAGTGCCACAATTGCAGCCACAAAATCCATCTCAGCAACAACCACAAGAG 120
α-D5 61 GTTAGAGTTCAGTGCCACAATTGCAGCCACAAAATCCATCTCAGCAACAACCACAAGAG 120
α-D5 121 CAAGTTCATTGGTACAACAACAACAATTTCCAGGGCAGCAACAACCATTTCCACCACAA 180
α-D5 121 CAAGTTCATTGGTACAACAACAACAATTTCCAGGGCAGCAACAACCATTTCCACCACAA 180
α-D5 181 CAGCCATATCCGCAGCCGCAACCATTTCCATCACAACAACCATATCTGCAGCTGCAACCA 240
α-D5 181 CAGCCATATCCGCAGCCGCAACCATTTCCATCACAACAACCATATCTGCAGCTGCAACCA 240
α-D5 241 TTTCCGCAAGCCGCAATACCATATCCGCAGCCGCAACTACCATATCCGCAGCCGCAACTA 300
α-D5 241 TT-----TCCGCAGCCGCAACTACCATATCCGCAGCCGCAACTA 279
Indel
α-D5 301 CCATATCCGCAGCCGCAACCATTTCCAGCCACACAACCATATCCACAATCgcaaccacag 360
α-D5 280 CCATATCCCAGCCGCAACCATTTCCAGCCACACAACCATATCCACAACCCGCAACCAAG 339
α-D5 361 tattcgcaaccacaacaacaatttcgagcagcagcagcaacaacaacaacaacaaca 420
α-D5 340 TATTCCGAACCAACAACAATTTCCGCAGCAGCAGCAACAACAACAACAACAACA-- 397
α-D5 421 aaacaacaacaacaacaacaacaacaacagatccttcaacaattttgcaacaacaacTG 480
α-D5 398 -AACAAAAACAACAACAACAACAACAAGATCCTTCAACAATTTGCAACAACAACCTG 456
α-D5 481 ATTCCATGCAGGGATGTTGATTGCAACAACACAGCATAGCGTATGGAAGCTCACAAGTT 540
α-D5 457 ATTCCATGCAGGGATGTTGATTGCAACAACACAGCATAGCGCATGGAAGCTCACAAGTT 516
α-D5 541 TTGCAACAAGTACTTACCAGCTGGTGCAACAATTTGTTGTTGTCAGCAGCTGTGGCAGATC 600
α-D5 517 TTGCAACAAGTACTTACCAGCTGGTGCAACAATTTGTTGTTGTCAGCAGCTGTGGCAGATC 576
α-D5 601 CCCGAGCAGTCGCGGTGCCAAGCCATCCACAATGTTGTTTATGCTATTATTCGTCATcaa 660
α-D5 577 CCCGAGCAGTCGCGGTGCCAAGCCATCCACAATGTTGTTTATGCTATTATTCGTCATCAA 636
α-D5 661 cagcaacaacaacaacaacaacaacaaca--a-aacaacCATTGAGCCAGGTCTCCTTC 717
α-D5 637 CAGCAACAACAACAACAACAACAACAACAACAACAACAACCGTTGAGCCAGGTCTCCTTC 696
α-D5 718 CAACAGCCTCAACAACAATATCCATCAGGCCAGGGCTCCTTCCAGCCATCTCAGCAAAAC 777
α-D5 697 CAACAGCCTCAACAACAATATCCATCAGGCCAGGGCTCCTTCCAGCCATCTCAGCAAAAC 756
α-D5 778 CCACAGGCCCAGGGCTCTGTCCAGCCTCAACAACAGTCCCAAGTTGAGGAAATAGGAAAC 837
α-D5 757 CCACAGGCCCAGGGCTCTGTCCAGCCTCAACAACAGTCCCAAGTTGAGGAAATAGGAAAC 816
α-D5 838 CTAGCGCTAGAGACGCTACCTGCAATGTGCAATGTCTATATCCCTCCATATTGCACCATT 897
α-D5 817 CTAGCGCTAGAGACGCTACCTGCAATGTGCAATGTCTATATCCCTCCATATTGCACCATT 876
α-D5 898 GCTCCAGTTGGCATCTTCGGTACTAACTGA 927
α-D5 877 GCTCCAGTTGGCATCTTCGGTACTAACTGA 906

```

**B**

```

α-D5 1 MKTFLILALLAIVATTATIIVRVVPVQLQPONPSQQQPQEQVPLVQQQQFPGQQQPFPPQ 60
α-D5 1 MKTFLILALLAIVATTATIIVRVVPVQLQPONPSQQQPQEQVPLVQQQQFPGQQQPFPPQ 60
α-D5 61 QYPYQPQPFPSQQPYLQLQPFPPQQLPYPQQLPYPQQLPYPQQLPYPQQLPFRPQQYPYQSQPQ 120
α-D5 61 QYPYQPQPFPSQQPYLQLQPF PQQQLPYPQQLPYPQQLPYPQQLPFRPQQYPYQ QPQ 113
33-mer
α-D5 121 YSQPQQPISQQQQQQQQQQKQQQQQQQQILQQILQQQLIPCRDVLQQHSIAYGSSQV 180
α-D5 114 YSQPQQPISQQQQQQQQQQQ Q+QQQQQQQILQQILQQQLIPCRDVLQQHSIA+GSSQV 172
α-D5 181 LQQSTYQLVQQLCCQQLWQIPEQSRCAIHNVVHAILH-QQQQQQQQQQKQPLSQVFS 239
α-D5 173 LQQSTYQLVQQLCCQQLWQIPEQSRCAIHNVVHAILHQQQQQQQQQQQQKQPLSQVFS 232
α-D5 240 QQPQQQYPSGQGSFQPSQQNPAQGSVQPQLPQFEEIRNLALETLPAMCNVYIPPYCTI 299
α-D5 233 QQPQQQYPSGQGSFQPSQQNPAQGSVQPQLPQFEEIRNLALETLPAMCNVYIPPYCTI 292
α-D5 300 APVGFIFGTN 308
α-D5 293 APVGFIFGTN 301

```

Figure S5. Alignments of nucleotide and amino acid sequences of  $\alpha$ -D5 and  $\alpha$ -D<sup>5</sup> homologues  
The indel in the nucleotide sequence and the corresponding 33-mer peptide region in the protein are indicated
